# Supplementary material for: The global, regional, and national burden of benign prostatic hyperplasia in 204 countries and territories from 2000 to 2019: a systematic analysis for the Global Burden of Disease Study 2019
Source: PubMed Central journal article supplement (PMC9640930; doi:10.1016/s2666-7568(22)00213-6), 2022-11
Supplement: mmc2.pdf [file mmc2.pdf]

# THE LANCET

## Healthy Longevity

### Supplementary appendix 2

This appendix formed part of the original submission and has been peer reviewed. We post it as supplied by the authors.

Supplement to: GBD 2019 Benign Prostatic Hyperplasia Collaborators. The global, regional, and national burden of benign prostatic hyperplasia in 204 countries and territories from 2000 to 2019: a systematic analysis for the Global Burden of Disease Study 2019. *Lancet Healthy Longev* 2022; published online Oct 20. [https://doi.org/10.1016/S2666-7568\(22\)00213-6](https://doi.org/10.1016/S2666-7568(22)00213-6).

## 1 APPENDIX 1. SUPPLEMENTARY METHODOLOGY

2 Table 1. Geographical hierarchy

| Location name          | Short name | Region name    | Super-region name                                |
|------------------------|------------|----------------|--------------------------------------------------|
| Armenia                | ARM        | Central Asia   | Central Europe, eastern Europe, and central Asia |
| Azerbaijan             | AZE        | Central Asia   | Central Europe, eastern Europe, and central Asia |
| Georgia                | GEO        | Central Asia   | Central Europe, eastern Europe, and central Asia |
| Kazakhstan             | KAZ        | Central Asia   | Central Europe, eastern Europe, and central Asia |
| Kyrgyzstan             | KGZ        | Central Asia   | Central Europe, eastern Europe, and central Asia |
| Mongolia               | MNG        | Central Asia   | Central Europe, eastern Europe, and central Asia |
| Tajikistan             | TJK        | Central Asia   | Central Europe, eastern Europe, and central Asia |
| Turkmenistan           | TKM        | Central Asia   | Central Europe, eastern Europe, and central Asia |
| Uzbekistan             | UZB        | Central Asia   | Central Europe, eastern Europe, and central Asia |
| Albania                | ALB        | Central Europe | Central Europe, eastern Europe, and central Asia |
| Bosnia and Herzegovina | BIH        | Central Europe | Central Europe, eastern Europe, and central Asia |
| Bulgaria               | BGR        | Central Europe | Central Europe, eastern Europe, and central Asia |
| Croatia                | HRV        | Central Europe | Central Europe, eastern Europe, and central Asia |
| Czech Republic         | CZE        | Central Europe | Central Europe, eastern Europe, and central Asia |
| Hungary                | HUN        | Central Europe | Central Europe, eastern Europe, and central Asia |
| Montenegro             | MNE        | Central Europe | Central Europe, eastern Europe, and central Asia |
| North Macedonia        | MKD        | Central Europe | Central Europe, eastern Europe, and central Asia |
| Poland                 | POL        | Central Europe | Central Europe, eastern Europe, and central Asia |
| Romania                | ROU        | Central Europe | Central Europe, eastern Europe, and central Asia |
| Serbia                 | SRB        | Central Europe | Central Europe, eastern Europe, and central Asia |
| Slovakia               | SVK        | Central Europe | Central Europe, eastern Europe, and central Asia |
| Slovenia               | SVN        | Central Europe | Central Europe, eastern Europe, and central Asia |
| Belarus                | BLR        | Eastern Europe | Central Europe, eastern Europe, and central Asia |
| Estonia                | EST        | Eastern Europe | Central Europe, eastern Europe, and central Asia |
| Latvia                 | LVA        | Eastern Europe | Central Europe, eastern Europe, and central Asia |

|             |     |                           |                                                  |
|-------------|-----|---------------------------|--------------------------------------------------|
| Lithuania   | LTU | Eastern Europe            | Central Europe, eastern Europe, and central Asia |
| Moldova     | MDA | Eastern Europe            | Central Europe, eastern Europe, and central Asia |
| Russia      | RUS | Eastern Europe            | Central Europe, eastern Europe, and central Asia |
| Ukraine     | UKR | Eastern Europe            | Central Europe, eastern Europe, and central Asia |
| Australia   | AUS | Australasia               | High-income                                      |
| New Zealand | NZL | Australasia               | High-income                                      |
| Brunei      | BRN | High-income Asia Pacific  | High-income                                      |
| Japan       | JPN | High-income Asia Pacific  | High-income                                      |
| South Korea | KOR | High-income Asia Pacific  | High-income                                      |
| Singapore   | SGP | High-income Asia Pacific  | High-income                                      |
| Canada      | CAN | High-income North America | High-income                                      |
| Greenland   | GRL | High-income North America | High-income                                      |
| USA         | USA | High-income North America | High-income                                      |
| Argentina   | ARG | Southern Latin America    | High-income                                      |
| Chile       | CHL | Southern Latin America    | High-income                                      |
| Uruguay     | URY | Southern Latin America    | High-income                                      |
| Andorra     | AND | Western Europe            | High-income                                      |
| Austria     | AUT | Western Europe            | High-income                                      |
| Belgium     | BEL | Western Europe            | High-income                                      |
| Cyprus      | CYP | Western Europe            | High-income                                      |
| Denmark     | DNK | Western Europe            | High-income                                      |
| Finland     | FIN | Western Europe            | High-income                                      |
| France      | FRA | Western Europe            | High-income                                      |
| Germany     | DEU | Western Europe            | High-income                                      |
| Greece      | GRC | Western Europe            | High-income                                      |
| Iceland     | ISL | Western Europe            | High-income                                      |
| Ireland     | IRL | Western Europe            | High-income                                      |
| Israel      | ISR | Western Europe            | High-income                                      |
| Italy       | ITA | Western Europe            | High-income                                      |
| Luxembourg  | LUX | Western Europe            | High-income                                      |
| Malta       | MLT | Western Europe            | High-income                                      |

|                                  |     |                      |                             |
|----------------------------------|-----|----------------------|-----------------------------|
| Monaco                           | MCO | Western Europe       | High-income                 |
| Netherlands                      | NLD | Western Europe       | High-income                 |
| Norway                           | NOR | Western Europe       | High-income                 |
| Portugal                         | PRT | Western Europe       | High-income                 |
| San Marino                       | SMR | Western Europe       | High-income                 |
| Spain                            | ESP | Western Europe       | High-income                 |
| Sweden                           | SWE | Western Europe       | High-income                 |
| Switzerland                      | CHE | Western Europe       | High-income                 |
| UK                               | GBR | Western Europe       | High-income                 |
| Bolivia                          | BOL | Andean Latin America | Latin America and Caribbean |
| Ecuador                          | ECU | Andean Latin America | Latin America and Caribbean |
| Peru                             | PER | Andean Latin America | Latin America and Caribbean |
| Antigua and Barbuda              | ATG | Caribbean            | Latin America and Caribbean |
| The Bahamas                      | BHS | Caribbean            | Latin America and Caribbean |
| Barbados                         | BRB | Caribbean            | Latin America and Caribbean |
| Belize                           | BLZ | Caribbean            | Latin America and Caribbean |
| Bermuda                          | BMU | Caribbean            | Latin America and Caribbean |
| Cuba                             | CUB | Caribbean            | Latin America and Caribbean |
| Dominica                         | DMA | Caribbean            | Latin America and Caribbean |
| Dominican Republic               | DOM | Caribbean            | Latin America and Caribbean |
| Grenada                          | GRD | Caribbean            | Latin America and Caribbean |
| Guyana                           | GUY | Caribbean            | Latin America and Caribbean |
| Haiti                            | HTI | Caribbean            | Latin America and Caribbean |
| Jamaica                          | JAM | Caribbean            | Latin America and Caribbean |
| Puerto Rico                      | PRI | Caribbean            | Latin America and Caribbean |
| Saint Kitts and Nevis            | KNA | Caribbean            | Latin America and Caribbean |
| Saint Lucia                      | LCA | Caribbean            | Latin America and Caribbean |
| Saint Vincent and the Grenadines | VCT | Caribbean            | Latin America and Caribbean |
| Suriname                         | SUR | Caribbean            | Latin America and Caribbean |
| Trinidad and Tobago              | TTO | Caribbean            | Latin America and Caribbean |
| Virgin Islands                   | VIR | Caribbean            | Latin America and Caribbean |

|                      |     |                              |                              |
|----------------------|-----|------------------------------|------------------------------|
| Colombia             | COL | Central Latin America        | Latin America and Caribbean  |
| Costa Rica           | CRI | Central Latin America        | Latin America and Caribbean  |
| El Salvador          | SLV | Central Latin America        | Latin America and Caribbean  |
| Guatemala            | GTM | Central Latin America        | Latin America and Caribbean  |
| Honduras             | HND | Central Latin America        | Latin America and Caribbean  |
| Mexico               | MEX | Central Latin America        | Latin America and Caribbean  |
| Nicaragua            | NIC | Central Latin America        | Latin America and Caribbean  |
| Panama               | PAN | Central Latin America        | Latin America and Caribbean  |
| Venezuela            | VEN | Central Latin America        | Latin America and Caribbean  |
| Brazil               | BRA | Tropical Latin America       | Latin America and Caribbean  |
| Paraguay             | PRY | Tropical Latin America       | Latin America and Caribbean  |
| Afghanistan          | AFG | North Africa and Middle East | North Africa and Middle East |
| Algeria              | DZA | North Africa and Middle East | North Africa and Middle East |
| Bahrain              | BHR | North Africa and Middle East | North Africa and Middle East |
| Egypt                | EGY | North Africa and Middle East | North Africa and Middle East |
| Iran                 | IRN | North Africa and Middle East | North Africa and Middle East |
| Iraq                 | IRQ | North Africa and Middle East | North Africa and Middle East |
| Jordan               | JOR | North Africa and Middle East | North Africa and Middle East |
| Kuwait               | KWT | North Africa and Middle East | North Africa and Middle East |
| Lebanon              | LBN | North Africa and Middle East | North Africa and Middle East |
| Libya                | LYB | North Africa and Middle East | North Africa and Middle East |
| Morocco              | MAR | North Africa and Middle East | North Africa and Middle East |
| Oman                 | OMN | North Africa and Middle East | North Africa and Middle East |
| Palestine            | PSE | North Africa and Middle East | North Africa and Middle East |
| Qatar                | QAT | North Africa and Middle East | North Africa and Middle East |
| Saudi Arabia         | SAU | North Africa and Middle East | North Africa and Middle East |
| Sudan                | SDN | North Africa and Middle East | North Africa and Middle East |
| Syria                | SYR | North Africa and Middle East | North Africa and Middle East |
| Tunisia              | TUN | North Africa and Middle East | North Africa and Middle East |
| Turkey               | TUR | North Africa and Middle East | North Africa and Middle East |
| United Arab Emirates | ARE | North Africa and Middle East | North Africa and Middle East |

|                                |     |                              |                                        |
|--------------------------------|-----|------------------------------|----------------------------------------|
| Yemen                          | YEM | North Africa and Middle East | North Africa and Middle East           |
| Bangladesh                     | BGD | South Asia                   | South Asia                             |
| Bhutan                         | BTN | South Asia                   | South Asia                             |
| India                          | IND | South Asia                   | South Asia                             |
| Nepal                          | NPL | South Asia                   | South Asia                             |
| Pakistan                       | PAK | South Asia                   | South Asia                             |
| China                          | CHN | East Asia                    | Southeast Asia, east Asia, and Oceania |
| North Korea                    | PRK | East Asia                    | Southeast Asia, east Asia, and Oceania |
| Taiwan (province of China)     | TWN | East Asia                    | Southeast Asia, east Asia, and Oceania |
| American Samoa                 | ASM | Oceania                      | Southeast Asia, east Asia, and Oceania |
| Cook Islands                   | COK | Oceania                      | Southeast Asia, east Asia, and Oceania |
| Fiji                           | FJI | Oceania                      | Southeast Asia, east Asia, and Oceania |
| Guam                           | GUM | Oceania                      | Southeast Asia, east Asia, and Oceania |
| Kiribati                       | KIR | Oceania                      | Southeast Asia, east Asia, and Oceania |
| Marshall Islands               | MHL | Oceania                      | Southeast Asia, east Asia, and Oceania |
| Federated States of Micronesia | FSM | Oceania                      | Southeast Asia, east Asia, and Oceania |
| Nauru                          | NRU | Oceania                      | Southeast Asia, east Asia, and Oceania |
| Niue                           | NIU | Oceania                      | Southeast Asia, east Asia, and Oceania |
| Northern Mariana Islands       | MNP | Oceania                      | Southeast Asia, east Asia, and Oceania |
| Palau                          | PLW | Oceania                      | Southeast Asia, east Asia, and Oceania |
| Papua New Guinea               | PNG | Oceania                      | Southeast Asia, east Asia, and Oceania |
| Samoa                          | WSM | Oceania                      | Southeast Asia, east Asia, and Oceania |
| Solomon Islands                | SLB | Oceania                      | Southeast Asia, east Asia, and Oceania |
| Tokelau                        | TKL | Oceania                      | Southeast Asia, east Asia, and Oceania |
| Tonga                          | TON | Oceania                      | Southeast Asia, east Asia, and Oceania |
| Tuvalu                         | TUV | Oceania                      | Southeast Asia, east Asia, and Oceania |
| Vanuatu                        | VUT | Oceania                      | Southeast Asia, east Asia, and Oceania |
| Cambodia                       | KHM | Southeast Asia               | Southeast Asia, east Asia, and Oceania |
| Indonesia                      | IDN | Southeast Asia               | Southeast Asia, east Asia, and Oceania |
| Laos                           | LAO | Southeast Asia               | Southeast Asia, east Asia, and Oceania |
| Malaysia                       | MYS | Southeast Asia               | Southeast Asia, east Asia, and Oceania |

|                          |     |                             |                                        |
|--------------------------|-----|-----------------------------|----------------------------------------|
| Maldives                 | MDV | Southeast Asia              | Southeast Asia, east Asia, and Oceania |
| Mauritius                | MUS | Southeast Asia              | Southeast Asia, east Asia, and Oceania |
| Myanmar                  | MMR | Southeast Asia              | Southeast Asia, east Asia, and Oceania |
| Philippines              | PHL | Southeast Asia              | Southeast Asia, east Asia, and Oceania |
| Seychelles               | SYC | Southeast Asia              | Southeast Asia, east Asia, and Oceania |
| Sri Lanka                | LKA | Southeast Asia              | Southeast Asia, east Asia, and Oceania |
| Thailand                 | THA | Southeast Asia              | Southeast Asia, east Asia, and Oceania |
| Timor-Leste              | TLS | Southeast Asia              | Southeast Asia, east Asia, and Oceania |
| Vietnam                  | VNM | Southeast Asia              | Southeast Asia, east Asia, and Oceania |
| Angola                   | AGO | Central sub-Saharan Africa  | Sub-Saharan Africa                     |
| Central African Republic | CAF | Central sub-Saharan Africa  | Sub-Saharan Africa                     |
| Congo (Brazzaville)      | COG | Central sub-Saharan Africa  | Sub-Saharan Africa                     |
| DR Congo                 | COD | Central sub-Saharan Africa  | Sub-Saharan Africa                     |
| Equatorial Guinea        | GNQ | Central sub-Saharan Africa  | Sub-Saharan Africa                     |
| Gabon                    | GAB | Central sub-Saharan Africa  | Sub-Saharan Africa                     |
| Burundi                  | BDI | Eastern sub-Saharan Africa  | Sub-Saharan Africa                     |
| Comoros                  | COM | Eastern sub-Saharan Africa  | Sub-Saharan Africa                     |
| Djibouti                 | DJI | Eastern sub-Saharan Africa  | Sub-Saharan Africa                     |
| Eritrea                  | ERI | Eastern sub-Saharan Africa  | Sub-Saharan Africa                     |
| Ethiopia                 | ETH | Eastern sub-Saharan Africa  | Sub-Saharan Africa                     |
| Kenya                    | KEN | Eastern sub-Saharan Africa  | Sub-Saharan Africa                     |
| Madagascar               | MDG | Eastern sub-Saharan Africa  | Sub-Saharan Africa                     |
| Malawi                   | MWI | Eastern sub-Saharan Africa  | Sub-Saharan Africa                     |
| Mozambique               | MOZ | Eastern sub-Saharan Africa  | Sub-Saharan Africa                     |
| Rwanda                   | RWA | Eastern sub-Saharan Africa  | Sub-Saharan Africa                     |
| Somalia                  | SOM | Eastern sub-Saharan Africa  | Sub-Saharan Africa                     |
| South Sudan              | SSD | Eastern sub-Saharan Africa  | Sub-Saharan Africa                     |
| Uganda                   | UGA | Eastern sub-Saharan Africa  | Sub-Saharan Africa                     |
| Tanzania                 | TZA | Eastern sub-Saharan Africa  | Sub-Saharan Africa                     |
| Zambia                   | ZMB | Eastern sub-Saharan Africa  | Sub-Saharan Africa                     |
| Botswana                 | BWA | Southern sub-Saharan Africa | Sub-Saharan Africa                     |

|                       |     |                             |                    |
|-----------------------|-----|-----------------------------|--------------------|
| eSwatini              | SWZ | Southern sub-Saharan Africa | Sub-Saharan Africa |
| Lesotho               | LSO | Southern sub-Saharan Africa | Sub-Saharan Africa |
| Namibia               | NAM | Southern sub-Saharan Africa | Sub-Saharan Africa |
| South Africa          | ZAF | Southern sub-Saharan Africa | Sub-Saharan Africa |
| Zimbabwe              | ZWE | Southern sub-Saharan Africa | Sub-Saharan Africa |
| Benin                 | BEN | Western sub-Saharan Africa  | Sub-Saharan Africa |
| Burkina Faso          | BFA | Western sub-Saharan Africa  | Sub-Saharan Africa |
| Cape Verde            | CPV | Western sub-Saharan Africa  | Sub-Saharan Africa |
| Cameroon              | CMR | Western sub-Saharan Africa  | Sub-Saharan Africa |
| Chad                  | TCD | Western sub-Saharan Africa  | Sub-Saharan Africa |
| Côte d'Ivoire         | CIV | Western sub-Saharan Africa  | Sub-Saharan Africa |
| The Gambia            | GMB | Western sub-Saharan Africa  | Sub-Saharan Africa |
| Ghana                 | GHA | Western sub-Saharan Africa  | Sub-Saharan Africa |
| Guinea                | GIN | Western sub-Saharan Africa  | Sub-Saharan Africa |
| Guinea-Bissau         | GNB | Western sub-Saharan Africa  | Sub-Saharan Africa |
| Liberia               | LBR | Western sub-Saharan Africa  | Sub-Saharan Africa |
| Mali                  | MLI | Western sub-Saharan Africa  | Sub-Saharan Africa |
| Mauritania            | MRT | Western sub-Saharan Africa  | Sub-Saharan Africa |
| Niger                 | NER | Western sub-Saharan Africa  | Sub-Saharan Africa |
| Nigeria               | NGA | Western sub-Saharan Africa  | Sub-Saharan Africa |
| São Tomé and Príncipe | STP | Western sub-Saharan Africa  | Sub-Saharan Africa |
| Senegal               | SEN | Western sub-Saharan Africa  | Sub-Saharan Africa |
| Sierra Leone          | SLE | Western sub-Saharan Africa  | Sub-Saharan Africa |
| Togo                  | TGO | Western sub-Saharan Africa  | Sub-Saharan Africa |

3

4



5 Table 2. List of countries by SDI quintile

| <b>Country name</b>              | <b>SDI quintile</b> |
|----------------------------------|---------------------|
| Afghanistan                      | Low SDI             |
| Benin                            | Low SDI             |
| Burkina Faso                     | Low SDI             |
| Burundi                          | Low SDI             |
| Central African Republic         | Low SDI             |
| Chad                             | Low SDI             |
| Comoros                          | Low SDI             |
| Côte d'Ivoire                    | Low SDI             |
| Democratic Republic of the Congo | Low SDI             |
| Eritrea                          | Low SDI             |
| Gambia                           | Low SDI             |
| Guinea                           | Low SDI             |
| Guinea-Bissau                    | Low SDI             |
| Haiti                            | Low SDI             |
| Liberia                          | Low SDI             |
| Madagascar                       | Low SDI             |
| Malawi                           | Low SDI             |
| Mali                             | Low SDI             |
| Mozambique                       | Low SDI             |
| Nepal                            | Low SDI             |
| Niger                            | Low SDI             |
| Papua New Guinea                 | Low SDI             |
| Rwanda                           | Low SDI             |
| Senegal                          | Low SDI             |
| Sierra Leone                     | Low SDI             |
| Solomon Islands                  | Low SDI             |
| Somalia                          | Low SDI             |
| South Sudan                      | Low SDI             |

|                                |                |
|--------------------------------|----------------|
| Togo                           | Low SDI        |
| Uganda                         | Low SDI        |
| United Republic of Tanzania    | Low SDI        |
| Yemen                          | Low SDI        |
| Angola                         | Low-middle SDI |
| Bangladesh                     | Low-middle SDI |
| Belize                         | Low-middle SDI |
| Bhutan                         | Low-middle SDI |
| Bolivia                        | Low-middle SDI |
| Cabo Verde                     | Low-middle SDI |
| Cambodia                       | Low-middle SDI |
| Cameroon                       | Low-middle SDI |
| Congo                          | Low-middle SDI |
| North Korea                    | Low-middle SDI |
| Djibouti                       | Low-middle SDI |
| Dominican Republic             | Low-middle SDI |
| El Salvador                    | Low-middle SDI |
| Eswatini                       | Low-middle SDI |
| Ghana                          | Low-middle SDI |
| Guatemala                      | Low-middle SDI |
| Honduras                       | Low-middle SDI |
| Kiribati                       | Low-middle SDI |
| Kyrgyzstan                     | Low-middle SDI |
| Laos                           | Low-middle SDI |
| Lesotho                        | Low-middle SDI |
| Maldives                       | Low-middle SDI |
| Marshall Islands               | Low-middle SDI |
| Mauritania                     | Low-middle SDI |
| Federated States of Micronesia | Low-middle SDI |
| Mongolia                       | Low-middle SDI |
| Morocco                        | Low-middle SDI |

|                       |                |
|-----------------------|----------------|
| Myanmar               | Low-middle SDI |
| Nicaragua             | Low-middle SDI |
| Palestine             | Low-middle SDI |
| São Tomé and Príncipe | Low-middle SDI |
| Sudan                 | Low-middle SDI |
| Tajikistan            | Low-middle SDI |
| Timor-Leste           | Low-middle SDI |
| Tuvalu                | Low-middle SDI |
| Vanuatu               | Low-middle SDI |
| Venezuela             | Low-middle SDI |
| Zambia                | Low-middle SDI |
| Zimbabwe              | Low-middle SDI |
| Albania               | Middle SDI     |
| Algeria               | Middle SDI     |
| Armenia               | Middle SDI     |
| Azerbaijan            | Middle SDI     |
| Botswana              | Middle SDI     |
| Colombia              | Middle SDI     |
| Costa Rica            | Middle SDI     |
| Cuba                  | Middle SDI     |
| Ecuador               | Middle SDI     |
| Egypt                 | Middle SDI     |
| Equatorial Guinea     | Middle SDI     |
| Fiji                  | Middle SDI     |
| Gabon                 | Middle SDI     |
| Grenada               | Middle SDI     |
| Guyana                | Middle SDI     |
| Iraq                  | Middle SDI     |
| Jamaica               | Middle SDI     |
| Namibia               | Middle SDI     |
| Nauru                 | Middle SDI     |

|                                  |                 |
|----------------------------------|-----------------|
| Panama                           | Middle SDI      |
| Paraguay                         | Middle SDI      |
| Peru                             | Middle SDI      |
| Saint Lucia                      | Middle SDI      |
| Saint Vincent and the Grenadines | Middle SDI      |
| Samoa                            | Middle SDI      |
| Suriname                         | Middle SDI      |
| Syria                            | Middle SDI      |
| Thailand                         | Middle SDI      |
| Tokelau                          | Middle SDI      |
| Tonga                            | Middle SDI      |
| Tunisia                          | Middle SDI      |
| Turkmenistan                     | Middle SDI      |
| Uzbekistan                       | Middle SDI      |
| Vietnam                          | Middle SDI      |
| American Samoa                   | High-middle SDI |
| Antigua and Barbuda              | High-middle SDI |
| Argentina                        | High-middle SDI |
| Bahamas                          | High-middle SDI |
| Bahrain                          | High-middle SDI |
| Barbados                         | High-middle SDI |
| Belarus                          | High-middle SDI |
| Bosnia and Herzegovina           | High-middle SDI |
| Bulgaria                         | High-middle SDI |
| Chile                            | High-middle SDI |
| Cook Islands                     | High-middle SDI |
| Croatia                          | High-middle SDI |
| Dominica                         | High-middle SDI |
| Georgia                          | High-middle SDI |
| Greece                           | High-middle SDI |
| Greenland                        | High-middle SDI |

|                          |                 |
|--------------------------|-----------------|
| Hungary                  | High-middle SDI |
| Israel                   | High-middle SDI |
| Jordan                   | High-middle SDI |
| Kazakhstan               | High-middle SDI |
| Lebanon                  | High-middle SDI |
| Libya                    | High-middle SDI |
| Malaysia                 | High-middle SDI |
| Malta                    | High-middle SDI |
| Mauritius                | High-middle SDI |
| Montenegro               | High-middle SDI |
| Niue                     | High-middle SDI |
| North Macedonia          | High-middle SDI |
| Northern Mariana Islands | High-middle SDI |
| Oman                     | High-middle SDI |
| Palau                    | High-middle SDI |
| Portugal                 | High-middle SDI |
| Republic of Moldova      | High-middle SDI |
| Romania                  | High-middle SDI |
| Saint Kitts and Nevis    | High-middle SDI |
| Serbia                   | High-middle SDI |
| Seychelles               | High-middle SDI |
| Spain                    | High-middle SDI |
| Sri Lanka                | High-middle SDI |
| Trinidad and Tobago      | High-middle SDI |
| Turkey                   | High-middle SDI |
| Virgin Islands           | High-middle SDI |
| Uruguay                  | High-middle SDI |
| Andorra                  | High SDI        |
| Australia                | High SDI        |
| Austria                  | High SDI        |
| Belgium                  | High SDI        |

|                            |          |
|----------------------------|----------|
| Bermuda                    | High SDI |
| Brunei                     | High SDI |
| Canada                     | High SDI |
| Cyprus                     | High SDI |
| Czechia                    | High SDI |
| Denmark                    | High SDI |
| Estonia                    | High SDI |
| Finland                    | High SDI |
| France                     | High SDI |
| Germany                    | High SDI |
| Guam                       | High SDI |
| Iceland                    | High SDI |
| Ireland                    | High SDI |
| Kuwait                     | High SDI |
| Latvia                     | High SDI |
| Lithuania                  | High SDI |
| Luxembourg                 | High SDI |
| Monaco                     | High SDI |
| Netherlands                | High SDI |
| Puerto Rico                | High SDI |
| Qatar                      | High SDI |
| South Korea                | High SDI |
| San Marino                 | High SDI |
| Saudi Arabia               | High SDI |
| Singapore                  | High SDI |
| Slovakia                   | High SDI |
| Slovenia                   | High SDI |
| Switzerland                | High SDI |
| Taiwan (province of China) | High SDI |
| United Arab Emirates       | High SDI |

6

7 Table 3. List of prevalence data sources for benign prostatic hyperplasia

8 A) Total data sources considered

| Country name | Data source                                                                                                                                                                                            | Year range |
|--------------|--------------------------------------------------------------------------------------------------------------------------------------------------------------------------------------------------------|------------|
| Austria      | Federal Ministry of Health (Austria), Statistics Austria. Austria Hospital Inpatient Discharges 1989-1992.                                                                                             | 1988-1992  |
| Austria      | Federal Ministry of Health (Austria), Statistics Austria. Austria Hospital Inpatient Discharges 1993-1997.                                                                                             | 1993-1997  |
| Austria      | Federal Ministry of Health (Austria), Statistics Austria. Austria Hospital Inpatient Discharges 1998-2002.                                                                                             | 1998-2002  |
| Austria      | Federal Ministry of Health (Austria), Statistics Austria. Austria Hospital Inpatient Discharges 2003-2007.                                                                                             | 2003-2007  |
| Austria      | Federal Ministry of Health (Austria), Statistics Austria. Austria Hospital Inpatient Discharges 2008-2012.                                                                                             | 2008-2012  |
| Austria      | Federal Ministry of Health (Austria), Statistics Austria. Austria Hospital Inpatient Discharges 2013-2014.                                                                                             | 2013-2017  |
| Belgium      | World Health Organization Regional Office for Europe (WHO/Europe). European Hospital Morbidity Database, 2008. Copenhagen, Denmark: World Health Organization Regional Office for Europe (WHO/Europe). | 2003-2007  |
| Belgium      | World Health Organization Regional Office for Europe (WHO/Europe). European Hospital Morbidity Database, 2008. Copenhagen, Denmark: World Health Organization Regional Office for Europe (WHO/Europe). | 2008-2012  |
| Botswana     | Ministry of Health (Botswana). Botswana Health Management Data System 2008-2009.                                                                                                                       | 2003-2007  |
| Botswana     | Ministry of Health (Botswana). Botswana Health Management Data System 2008-2009.                                                                                                                       | 2008-2012  |
| Brazil       | Ministry of Health (Brazil). Brazil Hospital Information System 1997. Rio de Janeiro, Brazil: Ministry of Health (Brazil).                                                                             | 1993-1997  |

|         |                                                                                                                                                                                                                                                                 |           |
|---------|-----------------------------------------------------------------------------------------------------------------------------------------------------------------------------------------------------------------------------------------------------------------|-----------|
| Brazil  | Ministry of Health (Brazil). Brazil Hospital Information System 1998-2002.                                                                                                                                                                                      | 1998-2002 |
| Brazil  | Ministry of Health (Brazil). Brazil Hospital Information System 2003-2007.                                                                                                                                                                                      | 2003-2007 |
| Brazil  | Ministry of Health (Brazil). Brazil Hospital Information System 2008-2012.                                                                                                                                                                                      | 2008-2012 |
| Brazil  | Ministry of Health (Brazil). Brazil Hospital Information System 2013-2014.                                                                                                                                                                                      | 2013-2017 |
| Chile   | Ministry of Health (Chile). Chile Hospital Discharges 2001-2002.                                                                                                                                                                                                | 1998-2002 |
| Chile   | Ministry of Health (Chile). Chile Hospital Discharges 2003-2007.                                                                                                                                                                                                | 2003-2007 |
| Chile   | Ministry of Health (Chile). Chile Hospital Discharges 2008-2012.                                                                                                                                                                                                | 2008-2012 |
| China   | Center for Health Statistics and Information, National Health and Family Planning Commission (China), Shanghai Municipal Center for Disease Control and Prevention (Shanghai CDC), Shanghai Health Information Center. China Hospital Inpatient Data 2013-2016. | 2013-2017 |
| Croatia | World Health Organization Regional Office for Europe (WHO/Europe). European Hospital Morbidity Database, 2008. Copenhagen, Denmark: World Health Organization Regional Office for Europe (WHO/Europe).                                                          | 1998-2002 |
| Croatia | World Health Organization Regional Office for Europe (WHO/Europe). European Hospital Morbidity Database, 2008. Copenhagen, Denmark: World Health Organization Regional Office for Europe (WHO/Europe).                                                          | 2003-2007 |
| Croatia | World Health Organization Regional Office for Europe (WHO/Europe). European Hospital Morbidity Database, 2008. Copenhagen, Denmark: World Health Organization Regional Office for Europe (WHO/Europe).                                                          | 2008-2012 |
| Croatia | World Health Organization Regional Office for Europe (WHO/Europe). European Hospital Morbidity Database, 2008. Copenhagen, Denmark: World Health Organization Regional Office for Europe (WHO/Europe).                                                          | 2013-2017 |
| Cyprus  | World Health Organization Regional Office for Europe (WHO/Europe). European Hospital Morbidity Database, 2008. Copenhagen, Denmark: World Health Organization Regional Office for Europe (WHO/Europe).                                                          | 2003-2007 |
| Cyprus  | World Health Organization Regional Office for Europe (WHO/Europe). European Hospital Morbidity Database, 2008. Copenhagen, Denmark: World Health Organization Regional Office for Europe (WHO/Europe).                                                          | 2008-2012 |



|         |                                                                                                                                                                                                        |           |
|---------|--------------------------------------------------------------------------------------------------------------------------------------------------------------------------------------------------------|-----------|
| Czechia | World Health Organization Regional Office for Europe (WHO/Europe). European Hospital Morbidity Database, 2008. Copenhagen, Denmark: World Health Organization Regional Office for Europe (WHO/Europe). | 2008-2012 |
| Denmark | World Health Organization Regional Office for Europe (WHO/Europe). European Hospital Morbidity Database, 2008. Copenhagen, Denmark: World Health Organization Regional Office for Europe (WHO/Europe). | 2003-2007 |
| Ecuador | National Institute of Statistics and Censuses (Ecuador). Ecuador Hospital Inpatient Discharges 1993-1997.                                                                                              | 1993-1997 |
| Ecuador | National Institute of Statistics and Censuses (Ecuador). Ecuador Hospital Inpatient Discharges 1998-2002.                                                                                              | 1998-2002 |
| Ecuador | National Institute of Statistics and Censuses (Ecuador). Ecuador Hospital Inpatient Discharges 2003-2007.                                                                                              | 2003-2007 |
| Ecuador | National Institute of Statistics and Censuses (Ecuador). Ecuador Hospital Inpatient Discharges 2008-2012.                                                                                              | 2008-2012 |
| Ecuador | National Institute of Statistics and Censuses (Ecuador). Ecuador Hospital Inpatient Discharges 2013-2014.                                                                                              | 2013-2017 |
| Ecuador | National Institute of Statistics and Censuses (Ecuador). Ecuador Statistical Registry of Hospital Beds and Expenses 2015-2017.                                                                         | 2015-2017 |
| England | NHS England. United Kingdom - England Hospital Episode Statistics 2001-2002.                                                                                                                           | 1998-2002 |
| England | NHS England. United Kingdom - England Hospital Episode Statistics 2003-2007.                                                                                                                           | 2003-2007 |
| England | NHS England. United Kingdom - England Hospital Episode Statistics 2008-2012.                                                                                                                           | 2008-2012 |
| England | NHS England. United Kingdom - England Hospital Episode Statistics 2013-2014.                                                                                                                           | 2013-2017 |
| Finland | World Health Organization Regional Office for Europe (WHO/Europe). European Hospital Morbidity Database, 2008. Copenhagen, Denmark: World Health Organization Regional Office for Europe (WHO/Europe). | 1998-2002 |
| Finland | World Health Organization Regional Office for Europe (WHO/Europe). European Hospital Morbidity Database, 2008. Copenhagen, Denmark: World Health Organization Regional Office for Europe (WHO/Europe). | 2003-2007 |
| Finland | World Health Organization Regional Office for Europe (WHO/Europe). European Hospital Morbidity Database, 2008. Copenhagen, Denmark: World Health Organization Regional Office for Europe (WHO/Europe). | 2008-2012 |

|                            |                                                                                                                                                                                                        |           |
|----------------------------|--------------------------------------------------------------------------------------------------------------------------------------------------------------------------------------------------------|-----------|
| Georgia                    | National Center for Disease Control and Public Health (Georgia). Georgia Hospital Data 2013-2014.                                                                                                      | 2013-2017 |
| Georgia                    | National Center for Disease Control and Public Health (Georgia). Georgia Hospital Discharges 2016-2017.                                                                                                | 2016-2017 |
| Germany                    | Federal Statistical Office (Germany). Germany Hospital Discharges by Diagnosis 2009. Wiesbaden, Germany: Federal Statistical Office (Germany), 2011.                                                   | 2008-2012 |
| Iceland                    | World Health Organization Regional Office for Europe (WHO/Europe). European Hospital Morbidity Database, 2008. Copenhagen, Denmark: World Health Organization Regional Office for Europe (WHO/Europe). | 2008-2012 |
| India                      | Nazareth Hospital, Shillong, JSS Hospital, Mysore, King George's Medical University (India). India Hospital Inpatient Data 2014-2017.                                                                  | 2013-2017 |
| India                      | Nazareth Hospital, Shillong. India - Shillong Nazareth Hospital Inpatient Discharges 2014.                                                                                                             | 2013-2017 |
| India                      | St. John's Medical College Hospital (India). India - Bangalore St. John's Medical College Hospital Inpatient Data 2017.                                                                                | 2013-2017 |
| Indonesia                  | Ministry of Health (Indonesia). Indonesia Integrated Hospital Data 2013. Jakarta, Indonesia: Ministry of Health (Indonesia), 2014.                                                                     | 2013-2017 |
| Iran (Islamic Republic of) | Ministry of Health and Medical Education (Iran). Iran Hospital Data 2001-2010.                                                                                                                         | 1998-2002 |
| Iran (Islamic Republic of) | Ministry of Health and Medical Education (Iran). Iran Hospital Data 2001-2010.                                                                                                                         | 2003-2007 |
| Iran (Islamic Republic of) | Ministry of Health and Medical Education (Iran). Iran Hospital Data 2001-2010.                                                                                                                         | 2008-2012 |
| Italy                      | Ministry of Health (Italy). Italy Hospital Inpatient Discharges 2005-2007.                                                                                                                             | 2003-2007 |
| Italy                      | Ministry of Health (Italy). Italy Hospital Inpatient Discharges 2008-2012.                                                                                                                             | 2008-2012 |
| Italy                      | Ministry of Health (Italy). Italy Hospital Inpatient Discharges 2013-2016.                                                                                                                             | 2013-2017 |
| Japan                      | Ministry of Health, Labour and Welfare (Japan). Japan Diagnosis Procedure Combination Database 2010-2012.                                                                                              | 2008-2012 |
| Japan                      | Ministry of Health, Labour and Welfare (Japan). Japan Diagnosis Procedure Combination Database 2013-2015.                                                                                              | 2013-2017 |
| Jordan                     | Ministry of Health (Jordan). Jordan Al-Bashir Hospital Discharges 2016.                                                                                                                                | 2013-2017 |
| Kenya                      | Ministry of Health (Kenya). Kenya National Inpatient Morbidity and Mortality Statistics 1999.                                                                                                          | 1998-2002 |

|            |                                                                                                                                                                                                        |           |
|------------|--------------------------------------------------------------------------------------------------------------------------------------------------------------------------------------------------------|-----------|
| Kyrgyzstan | Mandatory Health Insurance Fund (Kyrgyzstan). Kyrgyzstan - Bishkek Clinical-Related Groups Hospital Claims 2012.                                                                                       | 2008-2012 |
| Latvia     | World Health Organization Regional Office for Europe (WHO/Europe). European Hospital Morbidity Database, 2008. Copenhagen, Denmark: World Health Organization Regional Office for Europe (WHO/Europe). | 2003-2007 |
| Latvia     | World Health Organization Regional Office for Europe (WHO/Europe). European Hospital Morbidity Database, 2008. Copenhagen, Denmark: World Health Organization Regional Office for Europe (WHO/Europe). | 2008-2012 |
| Lithuania  | World Health Organization Regional Office for Europe (WHO/Europe). European Hospital Morbidity Database, 2008. Copenhagen, Denmark: World Health Organization Regional Office for Europe (WHO/Europe). | 1998-2002 |
| Lithuania  | World Health Organization Regional Office for Europe (WHO/Europe). European Hospital Morbidity Database, 2008. Copenhagen, Denmark: World Health Organization Regional Office for Europe (WHO/Europe). | 2003-2007 |
| Lithuania  | World Health Organization Regional Office for Europe (WHO/Europe). European Hospital Morbidity Database, 2008. Copenhagen, Denmark: World Health Organization Regional Office for Europe (WHO/Europe). | 2008-2012 |
| Luxembourg | World Health Organization Regional Office for Europe (WHO/Europe). European Hospital Morbidity Database, 2008. Copenhagen, Denmark: World Health Organization Regional Office for Europe (WHO/Europe). | 1998-2002 |
| Luxembourg | World Health Organization Regional Office for Europe (WHO/Europe). European Hospital Morbidity Database, 2008. Copenhagen, Denmark: World Health Organization Regional Office for Europe (WHO/Europe). | 2003-2007 |
| Luxembourg | World Health Organization Regional Office for Europe (WHO/Europe). European Hospital Morbidity Database, 2008. Copenhagen, Denmark: World Health Organization Regional Office for Europe (WHO/Europe). | 2008-2012 |
| Malta      | World Health Organization Regional Office for Europe (WHO/Europe). European Hospital Morbidity Database, 2008. Copenhagen, Denmark: World Health Organization Regional Office for Europe (WHO/Europe). | 2003-2007 |

|             |                                                                                                                                                                                                        |           |
|-------------|--------------------------------------------------------------------------------------------------------------------------------------------------------------------------------------------------------|-----------|
| Malta       | World Health Organization Regional Office for Europe (WHO/Europe). European Hospital Morbidity Database, 2008. Copenhagen, Denmark: World Health Organization Regional Office for Europe (WHO/Europe). | 2008-2012 |
| Mexico      | Ministry of Health (Mexico). Mexico Ministry of Health Hospital Discharges 2000-2002.                                                                                                                  | 1998-2002 |
| Mexico      | Ministry of Health (Mexico). Mexico Ministry of Health Hospital Discharges 2003-2007.                                                                                                                  | 2003-2007 |
| Mexico      | Ministry of Health (Mexico). Mexico Ministry of Health Hospital Discharges 2008-2012.                                                                                                                  | 2008-2012 |
| Mexico      | Ministry of Health (Mexico). Mexico Ministry of Health Hospital Discharges 2013-2015.                                                                                                                  | 2013-2017 |
| Nepal       | Department of Health Services, Ministry of Health and Population (Nepal). Nepal Hospital Inpatient Discharges 2010-2012.                                                                               | 2008-2012 |
| Nepal       | Department of Health Services, Ministry of Health and Population (Nepal). Nepal Hospital Inpatient Discharges 2013-2014.                                                                               | 2013-2017 |
| New Zealand | Ministry of Health (New Zealand). New Zealand National Minimum Dataset 2000-2002.                                                                                                                      | 1998-2002 |
| New Zealand | Ministry of Health (New Zealand). New Zealand National Minimum Dataset 2003-2007.                                                                                                                      | 2003-2007 |
| New Zealand | Ministry of Health (New Zealand). New Zealand National Minimum Dataset 2008-2012.                                                                                                                      | 2008-2012 |
| New Zealand | Ministry of Health (New Zealand). New Zealand National Minimum Dataset 2013-2014.                                                                                                                      | 2013-2017 |
| New Zealand | Ministry of Health (New Zealand). New Zealand National Minimum Dataset 2016-2017.                                                                                                                      | 2016-2017 |
| Norway      | Norwegian Directorate of Health. Norway Patient Register 2008-2012.                                                                                                                                    | 2008-2012 |
| Philippines | Philippine Health Insurance Corporation. Philippine Health Insurance Corporation Claims 2013-2016.                                                                                                     | 2013-2017 |
| Poland      | World Health Organization Regional Office for Europe (WHO/Europe). European Hospital Morbidity Database, 2008. Copenhagen, Denmark: World Health Organization Regional Office for Europe (WHO/Europe). | 2003-2007 |
| Poland      | World Health Organization Regional Office for Europe (WHO/Europe). European Hospital Morbidity Database, 2008. Copenhagen, Denmark: World Health Organization Regional Office for Europe (WHO/Europe). | 2008-2012 |
| Poland      | National Health Fund (Poland). Poland National Health Fund Patient Claims 2015.                                                                                                                        | 2015-2015 |
| Poland      | National Health Fund (Poland). Poland National Health Fund Patient Claims 2016.                                                                                                                        | 2016-2016 |

|          |                                                                                                                                                                                                        |           |
|----------|--------------------------------------------------------------------------------------------------------------------------------------------------------------------------------------------------------|-----------|
| Poland   | National Health Fund (Poland). Poland National Health Fund Patient Claims 2017.                                                                                                                        | 2017-2017 |
| Portugal | Ministry of Health (Portugal). Portugal Hospital Inpatient Discharges 2015.                                                                                                                            | 2013-2017 |
| Qatar    | Hamad Medical Corporation (Qatar). Qatar - Annual Inpatients Discharge Abstract: Hamad General Hospital 2002. Doha, Qatar: Hamad Medical Corporation (Qatar).                                          | 1998-2002 |
| Qatar    | Hamad Medical Corporation (Qatar). Qatar - Annual Inpatients Discharge Abstract: Hamad General Hospital and Women's Hospital 2003. Doha, Qatar: Hamad Medical Corporation (Qatar).                     | 2003-2007 |
| Romania  | World Health Organization Regional Office for Europe (WHO/Europe). European Hospital Morbidity Database, 2008. Copenhagen, Denmark: World Health Organization Regional Office for Europe (WHO/Europe). | 2008-2012 |
| Serbia   | World Health Organization Regional Office for Europe (WHO/Europe). European Hospital Morbidity Database, 2008. Copenhagen, Denmark: World Health Organization Regional Office for Europe (WHO/Europe). | 2008-2012 |
| Slovakia | World Health Organization Regional Office for Europe (WHO/Europe). European Hospital Morbidity Database, 2008. Copenhagen, Denmark: World Health Organization Regional Office for Europe (WHO/Europe). | 1998-2002 |
| Slovakia | World Health Organization Regional Office for Europe (WHO/Europe). European Hospital Morbidity Database, 2008. Copenhagen, Denmark: World Health Organization Regional Office for Europe (WHO/Europe). | 2003-2007 |
| Slovakia | World Health Organization Regional Office for Europe (WHO/Europe). European Hospital Morbidity Database, 2008. Copenhagen, Denmark: World Health Organization Regional Office for Europe (WHO/Europe). | 2008-2012 |
| Slovenia | World Health Organization Regional Office for Europe (WHO/Europe). European Hospital Morbidity Database, 2008. Copenhagen, Denmark: World Health Organization Regional Office for Europe (WHO/Europe). | 2003-2007 |
| Slovenia | World Health Organization Regional Office for Europe (WHO/Europe). European Hospital Morbidity Database, 2008. Copenhagen, Denmark: World Health Organization Regional Office for Europe (WHO/Europe). | 2008-2012 |
| Sweden   | National Board of Health and Welfare (Sweden). Sweden National Patient Register 1998-2002.                                                                                                             | 1998-2002 |

|                            |                                                                                                                                                                                                        |           |
|----------------------------|--------------------------------------------------------------------------------------------------------------------------------------------------------------------------------------------------------|-----------|
| Sweden                     | National Board of Health and Welfare (Sweden). Sweden National Patient Register 2003-2007.                                                                                                             | 2003-2007 |
| Sweden                     | National Board of Health and Welfare (Sweden). Sweden National Patient Register 2008-2012.                                                                                                             | 2008-2012 |
| Sweden                     | National Board of Health and Welfare (Sweden). Sweden National Patient Register 2013-2016.                                                                                                             | 2013-2017 |
| Switzerland                | World Health Organization Regional Office for Europe (WHO/Europe). European Hospital Morbidity Database, 2008. Copenhagen, Denmark: World Health Organization Regional Office for Europe (WHO/Europe). | 1998-2002 |
| Switzerland                | World Health Organization Regional Office for Europe (WHO/Europe). European Hospital Morbidity Database, 2008. Copenhagen, Denmark: World Health Organization Regional Office for Europe (WHO/Europe). | 2003-2007 |
| Switzerland                | World Health Organization Regional Office for Europe (WHO/Europe). European Hospital Morbidity Database, 2008. Copenhagen, Denmark: World Health Organization Regional Office for Europe (WHO/Europe). | 2008-2012 |
| Taiwan (Province of China) | Ministry of Health and Welfare (Taiwan). Taiwan National Health Insurance Claims Data 2016.                                                                                                            | 2016-2016 |
| Turkey                     | Ministry of Health (Turkey). Turkey Diagnosis-Related Group Hospital Inpatient Database 2011-2012.                                                                                                     | 2008-2012 |
| United States of America   | National Center for Health Statistics (NCHS), Centers for Disease Control and Prevention (CDC). United States National Hospital Discharge Survey 1988-1992.                                            | 1988-1992 |
| United States of America   | National Center for Health Statistics (NCHS), Centers for Disease Control and Prevention (CDC). United States National Hospital Discharge Survey 1993-1997.                                            | 1993-1997 |
| United States of America   | National Center for Health Statistics (NCHS), Centers for Disease Control and Prevention (CDC). United States National Hospital Discharge Survey 1998-2002.                                            | 1998-2002 |
| United States of America   | Truven Health Analytics. United States MarketScan Claims and Medicare Data - 2000. Ann Arbor, United States: Truven Health Analytics.                                                                  | 2000-2000 |
| United States of America   | National Center for Health Statistics (NCHS), Centers for Disease Control and Prevention (CDC). United States National Hospital Discharge Survey 2003-2007.                                            | 2003-2007 |
| United States of America   | Healthcare Cost and Utilization Project (HCUP), Agency for Healthcare Research and Quality (AHRQ). United States State Inpatient Databases 2003-2007.                                                  | 2003-2007 |

|                          |                                                                                                                                                             |           |
|--------------------------|-------------------------------------------------------------------------------------------------------------------------------------------------------------|-----------|
| United States of America | National Center for Health Statistics (NCHS), Centers for Disease Control and Prevention (CDC). United States National Hospital Discharge Survey 2008-2010. | 2008-2012 |
| United States of America | Healthcare Cost and Utilization Project (HCUP), Agency for Healthcare Research and Quality (AHRQ). United States State Inpatient Databases 2008-2009.       | 2008-2012 |
| United States of America | Truven Health Analytics. United States MarketScan Claims and Medicare Data - 2010. Ann Arbor, United States: Truven Health Analytics.                       | 2010-2010 |
| United States of America | Truven Health Analytics. United States MarketScan Claims and Medicare Data 2011. Ann Arbor, United States: Truven Health Analytics.                         | 2011-2011 |
| United States of America | Truven Health Analytics. United States MarketScan Claims and Medicare Data - 2012. Ann Arbor, United States: Truven Health Analytics.                       | 2012-2012 |
| United States of America | Truven Health Analytics. United States MarketScan Claims and Medicare Data 2013. Ann Arbor, United States: Truven Health Analytics.                         | 2013-2013 |
| United States of America | Truven Health Analytics. United States MarketScan Claims and Medicare Data 2014. Ann Arbor, United States: Truven Health Analytics.                         | 2014-2014 |
| United States of America | Truven Health Analytics. United States MarketScan Claims and Medicare Data 2015. Ann Arbor, United States: Truven Health Analytics.                         | 2015-2015 |
| United States of America | Truven Health Analytics. United States MarketScan Claims and Medicare Data 2016. Ann Arbor, United States: Truven Health Analytics.                         | 2016-2016 |
| Viet Nam                 | Ministry of Health (Vietnam). Vietnam Hospital Data 2013.                                                                                                   | 2013-2017 |

9 B) Data sources included

| Country name | Data source                                                                                                | Year range |
|--------------|------------------------------------------------------------------------------------------------------------|------------|
| Austria      | Federal Ministry of Health (Austria), Statistics Austria. Austria Hospital Inpatient Discharges 2003-2007. | 2003-2007  |
| Austria      | Federal Ministry of Health (Austria), Statistics Austria. Austria Hospital Inpatient Discharges 2008-2012. | 2008-2012  |
| Austria      | Federal Ministry of Health (Austria), Statistics Austria. Austria Hospital Inpatient Discharges 2013-2014. | 2013-2017  |

|          |                                                                                                                                                                                                                                                                 |           |
|----------|-----------------------------------------------------------------------------------------------------------------------------------------------------------------------------------------------------------------------------------------------------------------|-----------|
| Belgium  | World Health Organization Regional Office for Europe (WHO/Europe). European Hospital Morbidity Database, 2008. Copenhagen, Denmark: World Health Organization Regional Office for Europe (WHO/Europe).                                                          | 2003-2007 |
| Belgium  | World Health Organization Regional Office for Europe (WHO/Europe). European Hospital Morbidity Database, 2008. Copenhagen, Denmark: World Health Organization Regional Office for Europe (WHO/Europe).                                                          | 2008-2012 |
| Botswana | Ministry of Health (Botswana). Botswana Health Management Data System 2008-2009.                                                                                                                                                                                | 2003-2007 |
| Botswana | Ministry of Health (Botswana). Botswana Health Management Data System 2008-2009.                                                                                                                                                                                | 2008-2012 |
| Brazil   | Ministry of Health (Brazil). Brazil Hospital Information System 1997. Rio de Janeiro, Brazil: Ministry of Health (Brazil).                                                                                                                                      | 1993-1997 |
| Brazil   | Ministry of Health (Brazil). Brazil Hospital Information System 1998-2002.                                                                                                                                                                                      | 1998-2002 |
| Brazil   | Ministry of Health (Brazil). Brazil Hospital Information System 2003-2007.                                                                                                                                                                                      | 2003-2007 |
| Brazil   | Ministry of Health (Brazil). Brazil Hospital Information System 2008-2012.                                                                                                                                                                                      | 2008-2012 |
| Brazil   | Ministry of Health (Brazil). Brazil Hospital Information System 2013-2014.                                                                                                                                                                                      | 2013-2017 |
| Chile    | Ministry of Health (Chile). Chile Hospital Discharges 2008-2012.                                                                                                                                                                                                | 2008-2012 |
| China    | Center for Health Statistics and Information, National Health and Family Planning Commission (China), Shanghai Municipal Center for Disease Control and Prevention (Shanghai CDC), Shanghai Health Information Center. China Hospital Inpatient Data 2013-2016. | 2013-2017 |
| Croatia  | World Health Organization Regional Office for Europe (WHO/Europe). European Hospital Morbidity Database, 2008. Copenhagen, Denmark: World Health Organization Regional Office for Europe (WHO/Europe).                                                          | 1998-2002 |
| Croatia  | World Health Organization Regional Office for Europe (WHO/Europe). European Hospital Morbidity Database, 2008. Copenhagen, Denmark: World Health Organization Regional Office for Europe (WHO/Europe).                                                          | 2003-2007 |
| Croatia  | World Health Organization Regional Office for Europe (WHO/Europe). European Hospital Morbidity Database, 2008. Copenhagen, Denmark: World Health Organization Regional Office for Europe (WHO/Europe).                                                          | 2008-2012 |



|         |                                                                                                                                                                                                        |           |
|---------|--------------------------------------------------------------------------------------------------------------------------------------------------------------------------------------------------------|-----------|
| Croatia | World Health Organization Regional Office for Europe (WHO/Europe). European Hospital Morbidity Database, 2008. Copenhagen, Denmark: World Health Organization Regional Office for Europe (WHO/Europe). | 2013-2017 |
| Cyprus  | World Health Organization Regional Office for Europe (WHO/Europe). European Hospital Morbidity Database, 2008. Copenhagen, Denmark: World Health Organization Regional Office for Europe (WHO/Europe). | 2003-2007 |
| Cyprus  | World Health Organization Regional Office for Europe (WHO/Europe). European Hospital Morbidity Database, 2008. Copenhagen, Denmark: World Health Organization Regional Office for Europe (WHO/Europe). | 2008-2012 |
| Czechia | World Health Organization Regional Office for Europe (WHO/Europe). European Hospital Morbidity Database, 2008. Copenhagen, Denmark: World Health Organization Regional Office for Europe (WHO/Europe). | 2008-2012 |
| Denmark | World Health Organization Regional Office for Europe (WHO/Europe). European Hospital Morbidity Database, 2008. Copenhagen, Denmark: World Health Organization Regional Office for Europe (WHO/Europe). | 2003-2007 |
| Ecuador | National Institute of Statistics and Censuses (Ecuador). Ecuador Hospital Inpatient Discharges 2013-2014.                                                                                              | 2013-2017 |
| England | NHS England. United Kingdom - England Hospital Episode Statistics 2001-2002.                                                                                                                           | 1998-2002 |
| England | NHS England. United Kingdom - England Hospital Episode Statistics 2003-2007.                                                                                                                           | 2003-2007 |
| England | NHS England. United Kingdom - England Hospital Episode Statistics 2008-2012.                                                                                                                           | 2008-2012 |
| England | NHS England. United Kingdom - England Hospital Episode Statistics 2013-2014.                                                                                                                           | 2013-2017 |
| Finland | World Health Organization Regional Office for Europe (WHO/Europe). European Hospital Morbidity Database, 2008. Copenhagen, Denmark: World Health Organization Regional Office for Europe (WHO/Europe). | 1998-2002 |
| Finland | World Health Organization Regional Office for Europe (WHO/Europe). European Hospital Morbidity Database, 2008. Copenhagen, Denmark: World Health Organization Regional Office for Europe (WHO/Europe). | 2003-2007 |
| Finland | World Health Organization Regional Office for Europe (WHO/Europe). European Hospital Morbidity Database, 2008. Copenhagen, Denmark: World Health Organization Regional Office for Europe (WHO/Europe). | 2008-2012 |

|            |                                                                                                                                                                                                        |           |
|------------|--------------------------------------------------------------------------------------------------------------------------------------------------------------------------------------------------------|-----------|
| Georgia    | National Center for Disease Control and Public Health (Georgia). Georgia Hospital Data 2013-2014.                                                                                                      | 2013-2017 |
| Georgia    | National Center for Disease Control and Public Health (Georgia). Georgia Hospital Discharges 2016-2017.                                                                                                | 2016-2017 |
| Germany    | Federal Statistical Office (Germany). Germany Hospital Discharges by Diagnosis 2009. Wiesbaden, Germany: Federal Statistical Office (Germany), 2011.                                                   | 2008-2012 |
| Iceland    | World Health Organization Regional Office for Europe (WHO/Europe). European Hospital Morbidity Database, 2008. Copenhagen, Denmark: World Health Organization Regional Office for Europe (WHO/Europe). | 2008-2012 |
| India      | <p>Nazareth Hospital, Shillong, JSS Hospital, Mysore, King George's Medical University (India). India Hospital Inpatient Data 2014-2017.&nbsp;&lt;/p>                                                  | 2013-2017 |
| India      | <p>St. John's Medical College Hospital (India). India - Bangalore St. John's Medical College Hospital Inpatient Data 2017.&nbsp;&lt;/p>                                                                | 2013-2017 |
| Indonesia  | Ministry of Health (Indonesia). Indonesia Integrated Hospital Data 2013. Jakarta, Indonesia: Ministry of Health (Indonesia), 2014.                                                                     | 2013-2017 |
| Italy      | Ministry of Health (Italy). Italy Hospital Inpatient Discharges 2005-2007.                                                                                                                             | 2003-2007 |
| Italy      | Ministry of Health (Italy). Italy Hospital Inpatient Discharges 2008-2012.                                                                                                                             | 2008-2012 |
| Italy      | Ministry of Health (Italy). Italy Hospital Inpatient Discharges 2013-2016.                                                                                                                             | 2013-2017 |
| Japan      | Ministry of Health, Labour and Welfare (Japan). Japan Diagnosis Procedure Combination Database 2010-2012.                                                                                              | 2008-2012 |
| Japan      | Ministry of Health, Labour and Welfare (Japan). Japan Diagnosis Procedure Combination Database 2013-2015.                                                                                              | 2013-2017 |
| Jordan     | Ministry of Health (Jordan). Jordan Al-Bashir Hospital Discharges 2016.                                                                                                                                | 2013-2017 |
| Kenya      | Ministry of Health (Kenya). Kenya National Inpatient Morbidity and Mortality Statistics 1999.                                                                                                          | 1998-2002 |
| Kyrgyzstan | Mandatory Health Insurance Fund (Kyrgyzstan). Kyrgyzstan - Bishkek Clinical-Related Groups Hospital Claims 2012.                                                                                       | 2008-2012 |
| Latvia     | World Health Organization Regional Office for Europe (WHO/Europe). European Hospital Morbidity Database, 2008. Copenhagen, Denmark: World Health Organization Regional Office for Europe (WHO/Europe). | 2008-2012 |

|             |                                                                                                                                                                                                        |           |
|-------------|--------------------------------------------------------------------------------------------------------------------------------------------------------------------------------------------------------|-----------|
| Lithuania   | World Health Organization Regional Office for Europe (WHO/Europe). European Hospital Morbidity Database, 2008. Copenhagen, Denmark: World Health Organization Regional Office for Europe (WHO/Europe). | 1998-2002 |
| Lithuania   | World Health Organization Regional Office for Europe (WHO/Europe). European Hospital Morbidity Database, 2008. Copenhagen, Denmark: World Health Organization Regional Office for Europe (WHO/Europe). | 2008-2012 |
| Luxembourg  | World Health Organization Regional Office for Europe (WHO/Europe). European Hospital Morbidity Database, 2008. Copenhagen, Denmark: World Health Organization Regional Office for Europe (WHO/Europe). | 2008-2012 |
| Malta       | World Health Organization Regional Office for Europe (WHO/Europe). European Hospital Morbidity Database, 2008. Copenhagen, Denmark: World Health Organization Regional Office for Europe (WHO/Europe). | 2003-2007 |
| Malta       | World Health Organization Regional Office for Europe (WHO/Europe). European Hospital Morbidity Database, 2008. Copenhagen, Denmark: World Health Organization Regional Office for Europe (WHO/Europe). | 2008-2012 |
| Mexico      | Ministry of Health (Mexico). Mexico Ministry of Health Hospital Discharges 2000-2002.                                                                                                                  | 1998-2002 |
| Mexico      | Ministry of Health (Mexico). Mexico Ministry of Health Hospital Discharges 2003-2007.                                                                                                                  | 2003-2007 |
| Mexico      | Ministry of Health (Mexico). Mexico Ministry of Health Hospital Discharges 2008-2012.                                                                                                                  | 2008-2012 |
| Mexico      | <p>Ministry of Health (Mexico). Mexico Ministry of Health Hospital Discharges 2013-2015</p>                                                                                                            | 2013-2017 |
| Nepal       | Department of Health Services, Ministry of Health and Population (Nepal). Nepal Hospital Inpatient Discharges 2010-2012.                                                                               | 2008-2012 |
| Nepal       | Department of Health Services, Ministry of Health and Population (Nepal). Nepal Hospital Inpatient Discharges 2013-2014.                                                                               | 2013-2017 |
| New Zealand | Ministry of Health (New Zealand). New Zealand National Minimum Dataset 2000-2002.                                                                                                                      | 1998-2002 |
| New Zealand | Ministry of Health (New Zealand). New Zealand National Minimum Dataset 2003-2007.                                                                                                                      | 2003-2007 |

|             |                                                                                                                                                                                                        |           |
|-------------|--------------------------------------------------------------------------------------------------------------------------------------------------------------------------------------------------------|-----------|
| New Zealand | Ministry of Health (New Zealand). New Zealand National Minimum Dataset 2008-2012.                                                                                                                      | 2008-2012 |
| New Zealand | Ministry of Health (New Zealand). New Zealand National Minimum Dataset 2013-2014.                                                                                                                      | 2013-2017 |
| New Zealand | Ministry of Health (New Zealand). New Zealand National Minimum Dataset 2016-2017.                                                                                                                      | 2016-2017 |
| Norway      | Norwegian Directorate of Health. Norway Patient Register 2008-2012.                                                                                                                                    | 2008-2012 |
| Philippines | Philippine Health Insurance Corporation. Philippine Health Insurance Corporation Claims 2013-2016.                                                                                                     | 2013-2017 |
| Poland      | World Health Organization Regional Office for Europe (WHO/Europe). European Hospital Morbidity Database, 2008. Copenhagen, Denmark: World Health Organization Regional Office for Europe (WHO/Europe). | 2003-2007 |
| Poland      | World Health Organization Regional Office for Europe (WHO/Europe). European Hospital Morbidity Database, 2008. Copenhagen, Denmark: World Health Organization Regional Office for Europe (WHO/Europe). | 2008-2012 |
| Poland      | National Health Fund (Poland). Poland National Health Fund Patient Claims 2015.                                                                                                                        | 2015-2015 |
| Poland      | National Health Fund (Poland). Poland National Health Fund Patient Claims 2016.                                                                                                                        | 2016-2016 |
| Poland      | National Health Fund (Poland). Poland National Health Fund Patient Claims 2017.                                                                                                                        | 2017-2017 |
| Romania     | World Health Organization Regional Office for Europe (WHO/Europe). European Hospital Morbidity Database, 2008. Copenhagen, Denmark: World Health Organization Regional Office for Europe (WHO/Europe). | 2008-2012 |
| Serbia      | World Health Organization Regional Office for Europe (WHO/Europe). European Hospital Morbidity Database, 2008. Copenhagen, Denmark: World Health Organization Regional Office for Europe (WHO/Europe). | 2008-2012 |
| Slovakia    | World Health Organization Regional Office for Europe (WHO/Europe). European Hospital Morbidity Database, 2008. Copenhagen, Denmark: World Health Organization Regional Office for Europe (WHO/Europe). | 1998-2002 |

|                            |                                                                                                                                                                                                        |           |
|----------------------------|--------------------------------------------------------------------------------------------------------------------------------------------------------------------------------------------------------|-----------|
| Slovakia                   | World Health Organization Regional Office for Europe (WHO/Europe). European Hospital Morbidity Database, 2008. Copenhagen, Denmark: World Health Organization Regional Office for Europe (WHO/Europe). | 2003-2007 |
| Slovakia                   | World Health Organization Regional Office for Europe (WHO/Europe). European Hospital Morbidity Database, 2008. Copenhagen, Denmark: World Health Organization Regional Office for Europe (WHO/Europe). | 2008-2012 |
| Slovenia                   | World Health Organization Regional Office for Europe (WHO/Europe). European Hospital Morbidity Database, 2008. Copenhagen, Denmark: World Health Organization Regional Office for Europe (WHO/Europe). | 2003-2007 |
| Slovenia                   | World Health Organization Regional Office for Europe (WHO/Europe). European Hospital Morbidity Database, 2008. Copenhagen, Denmark: World Health Organization Regional Office for Europe (WHO/Europe). | 2008-2012 |
| Sweden                     | National Board of Health and Welfare (Sweden). Sweden National Patient Register 1998-2002.                                                                                                             | 1998-2002 |
| Sweden                     | National Board of Health and Welfare (Sweden). Sweden National Patient Register 2003-2007.                                                                                                             | 2003-2007 |
| Sweden                     | National Board of Health and Welfare (Sweden). Sweden National Patient Register 2008-2012.                                                                                                             | 2008-2012 |
| Sweden                     | National Board of Health and Welfare (Sweden). Sweden National Patient Register 2013-2016.                                                                                                             | 2013-2017 |
| Switzerland                | World Health Organization Regional Office for Europe (WHO/Europe). European Hospital Morbidity Database, 2008. Copenhagen, Denmark: World Health Organization Regional Office for Europe (WHO/Europe). | 1998-2002 |
| Switzerland                | World Health Organization Regional Office for Europe (WHO/Europe). European Hospital Morbidity Database, 2008. Copenhagen, Denmark: World Health Organization Regional Office for Europe (WHO/Europe). | 2003-2007 |
| Switzerland                | World Health Organization Regional Office for Europe (WHO/Europe). European Hospital Morbidity Database, 2008. Copenhagen, Denmark: World Health Organization Regional Office for Europe (WHO/Europe). | 2008-2012 |
| Taiwan (Province of China) | Ministry of Health and Welfare (Taiwan). Taiwan National Health Insurance Claims Data 2016.                                                                                                            | 2016-2016 |

|                          |                                                                                                                                                             |           |
|--------------------------|-------------------------------------------------------------------------------------------------------------------------------------------------------------|-----------|
| United States of America | National Center for Health Statistics (NCHS), Centers for Disease Control and Prevention (CDC). United States National Hospital Discharge Survey 1993-1997. | 1993-1997 |
| United States of America | National Center for Health Statistics (NCHS), Centers for Disease Control and Prevention (CDC). United States National Hospital Discharge Survey 1998-2002. | 1998-2002 |
| United States of America | Truven Health Analytics. United States MarketScan Claims and Medicare Data - 2000. Ann Arbor, United States: Truven Health Analytics.                       | 2000-2000 |
| United States of America | National Center for Health Statistics (NCHS), Centers for Disease Control and Prevention (CDC). United States National Hospital Discharge Survey 2003-2007. | 2003-2007 |
| United States of America | Healthcare Cost and Utilization Project (HCUP), Agency for Healthcare Research and Quality (AHRQ). United States State Inpatient Databases 2003-2007.       | 2003-2007 |
| United States of America | National Center for Health Statistics (NCHS), Centers for Disease Control and Prevention (CDC). United States National Hospital Discharge Survey 2008-2010. | 2008-2012 |
| United States of America | Healthcare Cost and Utilization Project (HCUP), Agency for Healthcare Research and Quality (AHRQ). United States State Inpatient Databases 2008-2009.       | 2008-2012 |
| United States of America | Truven Health Analytics. United States MarketScan Claims and Medicare Data - 2010. Ann Arbor, United States: Truven Health Analytics.                       | 2010-2010 |
| United States of America | Truven Health Analytics. United States MarketScan Claims and Medicare Data 2011. Ann Arbor, United States: Truven Health Analytics.                         | 2011-2011 |
| United States of America | Truven Health Analytics. United States MarketScan Claims and Medicare Data - 2012. Ann Arbor, United States: Truven Health Analytics.                       | 2012-2012 |
| United States of America | Truven Health Analytics. United States MarketScan Claims and Medicare Data 2013. Ann Arbor, United States: Truven Health Analytics.                         | 2013-2013 |
| United States of America | Truven Health Analytics. United States MarketScan Claims and Medicare Data 2014. Ann Arbor, United States: Truven Health Analytics.                         | 2014-2014 |

|                          |                                                                                                                                     |           |
|--------------------------|-------------------------------------------------------------------------------------------------------------------------------------|-----------|
| United States of America | Truven Health Analytics. United States MarketScan Claims and Medicare Data 2015. Ann Arbor, United States: Truven Health Analytics. | 2015-2015 |
| United States of America | Truven Health Analytics. United States MarketScan Claims and Medicare Data 2016. Ann Arbor, United States: Truven Health Analytics. | 2016-2016 |
| Viet Nam                 | Ministry of Health (Vietnam). Vietnam Hospital Data 2013.                                                                           | 2013-2017 |

10

11

12 Table 4. Percentage change of the number of prevalent cases of BPH and the age-standardized prevalence of BPH, globally, between  
 13 2000 and 2019, by age-group

| Age group | Percentage change between 2000 and 2019 (%) |                                      |
|-----------|---------------------------------------------|--------------------------------------|
|           | Cases (95% UI)                              | Age-standardized prevalence (95% UI) |
| 40 to 44  | 22.6<br>(16.7–26.8)                         | -7.02<br>(-11.5--3.87)               |
| 45 to 49  | 36.6<br>(33.0–39.1)                         | -3.57<br>(-6.07--1.80)               |
| 50 to 54  | 57.2<br>(54.2–59.3)                         | -4.17<br>(-6.00--2.87)               |
| 55 to 59  | 77.7<br>(75.4–79.7)                         | 0.0147<br>(-1.29–1.13)               |
| 60 to 64  | 61.1<br>(59.2–62.8)                         | -3.33<br>(-4.44--2.29)               |
| 65 to 69  | 65.6<br>(64.0–67.5)                         | -1.84<br>(-2.81--0.732)              |
| 70 to 74  | 55.8<br>(53.7–57.9)                         | -3.19<br>(-4.48--1.88)               |
| 75 to 79  | 74.6<br>(72.8–76.3)                         | 1.16<br>(0.112–2.16)                 |
| 80 to 84  | 126<br>(124–129)                            | 4.61<br>(3.41–5.69)                  |
| 85 to 89  | 142<br>(138–145)                            | 5.04<br>(3.29–6.49)                  |
| 90 to 94  | 166<br>(160–170)                            | 4.90<br>(2.70–6.71)                  |
| 95 plus   | 173<br>(166–179)                            | 0.166<br>(-2.27--2.45)               |

14

15



16 Table 5. Global, super-region, and country-level DALYs of benign prostatic hyperplasia and percentage change between 2000 and  
 17 2019

|                                                         | 2000                               |                                             | 2019                                |                                             | Percentage change between 2000 and 2019 |                                 |
|---------------------------------------------------------|------------------------------------|---------------------------------------------|-------------------------------------|---------------------------------------------|-----------------------------------------|---------------------------------|
|                                                         | Cases (95% UI)                     | Age-standardised DALYs per 100,000 (95% UI) | Cases (95% UI)                      | Age-standardised DALYs per 100,000 (95% UI) | Cases (95% UI)                          | Age-standardised DALYs (95% UI) |
| <b>Global</b>                                           | <b>1090000</b><br>(657000–1630000) | <b>49·2</b><br>(29·9–73·2)                  | <b>1860000</b><br>(1130000–2780000) | <b>48·9</b><br>(29·7–72·6)                  | <b>70·5</b><br>(68·6–72·7)              | <b>-0·640</b><br>(-1·46–0·249)  |
| <b>Central Europe, eastern Europe, and central Asia</b> | <b>194000</b><br>(117000–287000)   | <b>95·8</b><br>(58·3–140)                   | <b>241000</b><br>(145000–361000)    | <b>94·7</b><br>(57·3–140)                   | <b>24·6</b><br>(20·9–28·3)              | <b>-1·19</b><br>(-3·75–1·29)    |
| Central Asia                                            | 10300<br>(6080–15400)              | 50·9<br>(30·2–75·8)                         | 15200<br>(8920–23000)               | 51·7<br>(30·5–77·5)                         | 48·0<br>(39·2–56·9)                     | 1·54<br>(-2·05–4·74)            |
| Armenia                                                 | 710<br>(408–1090)                  | 50·6<br>(29·4–76·8)                         | 928<br>(533–1420)                   | 51·9<br>(29·7–78·6)                         | 30·7<br>(19·5–42·7)                     | 2·62<br>(-4·91–11·0)            |
| Azerbaijan                                              | 1180<br>(677–1810)                 | 50·7<br>(29·3–76·8)                         | 2030<br>(1140–3090)                 | 51·8<br>(29·9–78·3)                         | 72·3<br>(56·5–90·0)                     | 2·18<br>(-4·76–9·77)            |
| Georgia                                                 | 1560<br>(957–2290)                 | 59·4<br>(36·9–87·6)                         | 1470<br>(916–2160)                  | 60·4<br>(37·3–88·9)                         | -5·30<br>(-12·0–1·97)                   | 1·59<br>(-5·74–9·28)            |
| Kazakhstan                                              | 2340<br>(1360–3580)                | 49·7<br>(29·4–75·6)                         | 3360<br>(1920–5170)                 | 50·8<br>(29·5–77·5)                         | 43·6<br>(31·2–57·9)                     | 2·20<br>(-5·90–10·8)            |
| Kyrgyzstan                                              | 543<br>(317–829)                   | 42·6<br>(25·0–65·3)                         | 781<br>(454–1190)                   | 43·4<br>(25·1–65·7)                         | 43·8<br>(28·2–61·4)                     | 1·86<br>(-6·00–11·0)            |
| Mongolia                                                | 226<br>(130–339)                   | 49·4<br>(29·1–75·0)                         | 446<br>(258–677)                    | 50·6<br>(29·7–77·2)                         | 97·7<br>(78·9–116)                      | 2·31<br>(-5·95–10·7)            |
| Tajikistan                                              | 656<br>(384–1010)                  | 50·2<br>(29·4–77·3)                         | 1090<br>(628–1690)                  | 51·1<br>(29·4–77·2)                         | 66·4<br>(48·1–87·2)                     | 1·69<br>(-5·82–10·6)            |
| Turkmenistan                                            | 449<br>(259–670)                   | 50·4<br>(29·0–76·0)                         | 800<br>(464–1220)                   | 51·4<br>(30·2–78·2)                         | 78·0<br>(62·6–95·0)                     | 1·92<br>(-5·97–11·3)            |

|                        |                        |                     |                        |                     |                      |                        |
|------------------------|------------------------|---------------------|------------------------|---------------------|----------------------|------------------------|
| Uzbekistan             | 2600<br>(1500-3990)    | 50.3<br>(29.5-75.9) | 4280<br>(2410-6660)    | 51.6<br>(29.9-79.8) | 64.3<br>(47.6-84.4)  | 2.58<br>(-4.87-11.1)   |
| Central Europe         | 44100<br>(27300-64600) | 62.3<br>(38.3-91.0) | 58400<br>(36400-85700) | 61.8<br>(38.6-90.2) | 32.5<br>(29.2-36.2)  | -0.678<br>(-2.82-1.43) |
| Albania                | 754<br>(435-1160)      | 59.4<br>(34.4-90.1) | 1280<br>(750-1950)     | 59.8<br>(35.1-90.7) | 69.6<br>(58.0-84.0)  | 0.524<br>(-5.63-8.32)  |
| Bosnia and Herzegovina | 1290<br>(758-1960)     | 60.4<br>(35.5-91.6) | 1650<br>(956-2540)     | 60.7<br>(35.5-92.1) | 28.1<br>(16.5-40.6)  | 0.500<br>(-7.73-9.35)  |
| Bulgaria               | 3680<br>(2180-5640)    | 60.8<br>(36.0-92.7) | 3880<br>(2230-5900)    | 60.5<br>(35.0-91.9) | 5.18<br>(-3.59-13.0) | -0.408<br>(-8.11-6.81) |
| Croatia                | 1780<br>(1100-2630)    | 58.6<br>(36.9-86.5) | 2270<br>(1420-3300)    | 58.7<br>(36.7-85.1) | 27.6<br>(18.5-38.5)  | 0.157<br>(-6.91-8.18)  |
| Czechia                | 4970<br>(2970-7470)    | 77.9<br>(46.6-118)  | 7430<br>(4430-11000)   | 78.0<br>(46.5-116)  | 49.4<br>(37.1-61.5)  | 0.0938<br>(-8.02-7.63) |
| Hungary                | 3850<br>(2260-5950)    | 60.2<br>(35.4-92.1) | 4810<br>(2800-7330)    | 60.3<br>(35.3-91.0) | 24.9<br>(14.8-36.7)  | 0.0426<br>(-7.81-8.58) |
| Montenegro             | 206<br>(121-313)       | 60.7<br>(35.6-91.6) | 273<br>(160-415)       | 60.4<br>(35.4-90.9) | 32.5<br>(22.4-42.7)  | -0.555<br>(-7.71-6.76) |
| North Macedonia        | 644<br>(376-982)       | 61.0<br>(36.0-93.0) | 955<br>(556-1450)      | 61.1<br>(35.6-91.8) | 48.4<br>(37.0-61.7)  | 0.115<br>(-7.21-8.58)  |
| Poland                 | 10200<br>(6300-15000)  | 51.0<br>(31.2-74.7) | 15300<br>(9380-22400)  | 51.1<br>(31.6-74.8) | 49.8<br>(45.2-54.0)  | 0.324<br>(-1.99-2.45)  |
| Romania                | 10000<br>(6180-14900)  | 71.8<br>(44.6-106)  | 11700<br>(7300-17400)  | 72.4<br>(45.2-108)  | 17.1<br>(8.29-26.0)  | 0.817<br>(-6.48-7.69)  |
| Serbia                 | 4360<br>(2700-6410)    | 69.8<br>(43.2-103)  | 5330<br>(3350-7950)    | 69.9<br>(43.8-104)  | 22.4<br>(13.5-32.8)  | 0.257<br>(-6.93-7.76)  |
| Slovakia               | 1800<br>(1130-2660)    | 65.9<br>(41.4-96.7) | 2670<br>(1670-3920)    | 65.8<br>(41.3-96.5) | 47.8<br>(37.5-58.4)  | -0.215<br>(-6.98-6.86) |

|                          |                                         |                                   |                                         |                                   |                                   |                                      |
|--------------------------|-----------------------------------------|-----------------------------------|-----------------------------------------|-----------------------------------|-----------------------------------|--------------------------------------|
| Slovenia                 | 558<br>(347-816)                        | 46.9<br>(29.3-68.6)               | 898<br>(559-1310)                       | 46.5<br>(29.0-67.6)               | 60.9<br>(48.0-73.0)               | -0.890<br>(-8.99-6.40)               |
| Eastern Europe           | 139000<br>(83500-208000)                | 127<br>(76.3-188)                 | 168000<br>(99100-253000)                | 128<br>(76.5-190)                 | 20.3<br>(15.4-25.3)               | 0.934<br>(-2.60-4.32)                |
| Belarus                  | 6430<br>(3830-9620)                     | 123<br>(73.3-183)                 | 7280<br>(4300-11000)                    | 123<br>(74.1-183)                 | 13.2<br>(5.33-20.6)               | 0.265<br>(-6.55-6.76)                |
| Estonia                  | 977<br>(587-1470)                       | 124<br>(75.2-185)                 | 1250<br>(759-1850)                      | 125<br>(76.3-185)                 | 28.2<br>(20.0-36.0)               | 1.17<br>(-4.98-7.11)                 |
| Latvia                   | 1620<br>(991-2360)                      | 123<br>(76.4-179)                 | 1840<br>(1150-2710)                     | 126<br>(78.1-185)                 | 13.9<br>(5.48-20.9)               | 2.04<br>(-5.12-8.03)                 |
| Lithuania                | 2550<br>(1600-3710)                     | 135<br>(85.2-196)                 | 2920<br>(1830-4270)                     | 136<br>(85.3-200)                 | 14.6<br>(7.61-21.2)               | 1.12<br>(-5.14-6.77)                 |
| Republic of Moldova      | 2350<br>(1410-3500)                     | 124<br>(74.6-185)                 | 2920<br>(1740-4400)                     | 125<br>(74.4-185)                 | 24.4<br>(17.0-32.3)               | 0.319<br>(-5.54-6.35)                |
| Russia                   | 89900<br>(54100-135000)                 | 127<br>(76.4-189)                 | 114000<br>(67500-174000)                | 128<br>(76.4-192)                 | 27.3<br>(19.9-34.6)               | 1.16<br>(-4.42-6.54)                 |
| Ukraine                  | 35400<br>(20900-53500)                  | 127<br>(75.8-190)                 | 36800<br>(21700-54800)                  | 128<br>(76.2-190)                 | 4.02<br>(-2.23-10.6)              | 0.438<br>(-5.05-5.92)                |
| <b>High-income</b>       | <b>233000</b><br><b>(144000-340000)</b> | <b>37.3</b><br><b>(23.1-54.2)</b> | <b>347000</b><br><b>(213000-506000)</b> | <b>36.5</b><br><b>(22.5-52.9)</b> | <b>48.8</b><br><b>(46.3-51.6)</b> | <b>-2.29</b><br><b>(-3.74-0.833)</b> |
| Australasia              | 5340<br>(3150-8260)                     | 39.0<br>(23.0-60.4)               | 9360<br>(5480-14400)                    | 39.1<br>(22.9-60.2)               | 75.2<br>(61.8-89.9)               | 0.307<br>(-7.19-8.78)                |
| Australia                | 4380<br>(2480-6870)                     | 38.1<br>(21.6-59.8)               | 7710<br>(4440-12100)                    | 38.3<br>(22.1-60.2)               | 76.2<br>(60.1-94.6)               | 0.601<br>(-8.49-11.0)                |
| New Zealand              | 962<br>(587-1430)                       | 43.7<br>(26.8-65.0)               | 1640<br>(1010-2420)                     | 43.4<br>(26.8-63.6)               | 70.9<br>(56.0-85.8)               | -0.888<br>(-9.32-7.48)               |
| High income Asia Pacific | 30600<br>(18100-47000)                  | 24.7<br>(14.6-37.7)               | 47700<br>(28000-73000)                  | 23.8<br>(14.0-36.2)               | 55.7<br>(48.2-65.1)               | -3.40<br>(-6.29-0.640)               |

|                           |                          |                     |                           |                     |                     |                        |
|---------------------------|--------------------------|---------------------|---------------------------|---------------------|---------------------|------------------------|
| Brunei                    | 13.1<br>(7.51–20.6)      | 24.1<br>(13.9–37.8) | 30.6<br>(17.6–48.5)       | 23.3<br>(13.5–35.8) | 134<br>(109–164)    | -3.51<br>(-13.2–7.61)  |
| Japan                     | 26400<br>(15600–40300)   | 25.1<br>(14.9–38.2) | 37400<br>(22200–57300)    | 24.4<br>(14.4–37.0) | 41.6<br>(34.2–50.9) | -2.62<br>(-4.92–0.314) |
| South Korea               | 3880<br>(2190–6200)      | 22.4<br>(12.9–35.6) | 9400<br>(5380–14800)      | 22.2<br>(12.8–34.6) | 142<br>(114–171)    | -1.06<br>(-11.4–9.97)  |
| Singapore                 | 317<br>(179–492)         | 22.6<br>(13.1–35.1) | 861<br>(492–1350)         | 22.0<br>(12.6–34.3) | 172<br>(144–199)    | -2.44<br>(-11.9–6.87)  |
| High income North America | 60300<br>(38500–88700)   | 34.3<br>(21.8–50.4) | 101000<br>(64300–148000)  | 34.9<br>(22.4–51.4) | 66.9<br>(63.2–70.8) | 1.90<br>(-0.0970–3.84) |
| Canada                    | 6370<br>(3720–9750)      | 35.1<br>(20.5–53.4) | 11300<br>(6570–17500)     | 35.3<br>(20.6–54.6) | 77.3<br>(62.2–93.8) | 0.594<br>(-7.56–9.52)  |
| Greenland                 | 7.26<br>(4.12–11.3)      | 34.2<br>(19.8–51.8) | 13.1<br>(7.39–20.4)       | 34.5<br>(20.1–52.2) | 81.0<br>(63.1–99.8) | 0.689<br>(-7.75–9.44)  |
| USA                       | 54000<br>(34000–79800)   | 34.2<br>(21.5–50.4) | 89400<br>(56800–132000)   | 34.9<br>(22.1–51.6) | 65.7<br>(62.1–69.4) | 2.03<br>(0.235–3.96)   |
| Southern Latin America    | 6080<br>(3540–9360)      | 24.9<br>(14.5–38.5) | 9210<br>(5310–14400)      | 24.8<br>(14.4–38.6) | 51.4<br>(41.2–63.3) | -0.246<br>(-6.86–7.23) |
| Argentina                 | 3950<br>(2310–6140)      | 23.7<br>(13.8–36.8) | 5550<br>(3190–8700)       | 23.3<br>(13.4–36.4) | 40.5<br>(27.9–55.4) | -1.42<br>(-10.2–8.53)  |
| Chile                     | 1700<br>(974–2630)       | 28.9<br>(16.5–44.5) | 3140<br>(1760–4880)       | 28.4<br>(16.0–44.1) | 85.0<br>(66.8–106)  | -1.64<br>(-11.5–8.65)  |
| Uruguay                   | 434<br>(251–679)         | 23.1<br>(13.3–36.3) | 520<br>(302–801)          | 22.9<br>(13.3–35.3) | 19.7<br>(8.67–31.7) | -0.873<br>(-10.3–8.84) |
| Western Europe            | 131000<br>(80200–191000) | 45.3<br>(27.7–66.0) | 180000<br>(110000–263000) | 44.9<br>(27.4–65.6) | 37.7<br>(34.1–41.2) | -0.798<br>(-3.10–1.52) |
| Andorra                   | 14.2<br>(8.19–22.1)      | 32.7<br>(18.9–50.6) | 22.8<br>(13.3–35.3)       | 32.3<br>(18.7–50.2) | 60.2<br>(43.7–76.2) | -1.39<br>(-11.4–8.20)  |

|            |                        |                     |                        |                     |                     |                        |
|------------|------------------------|---------------------|------------------------|---------------------|---------------------|------------------------|
| Austria    | 4860<br>(3040-7100)    | 90.1<br>(56.4-132)  | 7190<br>(4430-10600)   | 91.0<br>(55.9-134)  | 48.1<br>(38.1-58.2) | 0.929<br>(-6.05-7.70)  |
| Belgium    | 5690<br>(2980-8930)    | 74.5<br>(38.9-116)  | 7310<br>(3830-11300)   | 71.5<br>(37.4-110)  | 28.5<br>(6.53-44.2) | -3.99<br>(-19.8-7.39)  |
| Cyprus     | 158<br>(96.7-241)      | 32.4<br>(20.0-49.3) | 307<br>(186-464)       | 31.6<br>(19.3-47.8) | 95.0<br>(77.9-114)  | -2.27<br>(-10.8-7.30)  |
| Denmark    | 1300<br>(718-2030)     | 34.7<br>(19.2-54.3) | 1890<br>(1060-3040)    | 34.5<br>(19.3-55.2) | 46.0<br>(31.4-62.2) | -0.418<br>(-9.52-10.2) |
| Finland    | 2710<br>(1690-3980)    | 78.6<br>(49.2-116)  | 4530<br>(2830-6670)    | 78.8<br>(49.2-116)  | 67.6<br>(56.3-80.0) | 0.230<br>(-6.74-7.64)  |
| France     | 13400<br>(7710-20600)  | 32.6<br>(18.7-50.6) | 19100<br>(11100-29900) | 32.4<br>(18.6-50.4) | 42.3<br>(30.2-56.8) | -0.777<br>(-9.15-8.81) |
| Germany    | 20100<br>(11500-31100) | 32.5<br>(18.5-50.3) | 27300<br>(15500-42100) | 32.3<br>(18.3-49.8) | 36.2<br>(23.2-51.8) | -0.725<br>(-9.24-8.83) |
| Greece     | 2790<br>(1590-4380)    | 32.4<br>(18.4-50.4) | 3290<br>(1860-5090)    | 32.1<br>(18.4-49.4) | 18.1<br>(6.71-31.4) | -1.09<br>(-10.6-8.70)  |
| Iceland    | 49.1<br>(27.6-75.8)    | 31.2<br>(17.6-47.6) | 82.0<br>(47.0-128)     | 30.8<br>(17.7-48.0) | 66.9<br>(49.6-84.6) | -1.19<br>(-11.0-8.69)  |
| Ireland    | 695<br>(398-1070)      | 33.0<br>(19.0-50.8) | 1170<br>(677-1830)     | 32.5<br>(18.7-50.9) | 68.7<br>(53.2-84.9) | -1.50<br>(-10.4-7.75)  |
| Israel     | 972<br>(556-1510)      | 33.6<br>(19.2-52.1) | 1770<br>(1010-2770)    | 33.2<br>(19.0-51.9) | 81.8<br>(65.5-99.8) | -1.18<br>(-9.75-8.56)  |
| Italy      | 30800<br>(19100-45600) | 67.9<br>(42.1-101)  | 39700<br>(24400-58600) | 67.7<br>(42.0-101)  | 28.9<br>(25.5-32.6) | -0.277<br>(-2.65-2.29) |
| Luxembourg | 88.7<br>(51.0-139)     | 32.6<br>(18.9-51.2) | 150<br>(86.7-235)      | 32.2<br>(18.7-50.4) | 69.0<br>(53.1-85.2) | -1.14<br>(-9.97-8.15)  |
| Malta      | 108<br>(65.0-165)      | 44.3<br>(26.7-67.6) | 196<br>(119-297)       | 43.9<br>(26.6-66.5) | 82.1<br>(67.4-99.4) | -0.974<br>(-8.94-7.96) |

|                                    |                                       |                                   |                                        |                                   |                                   |                                      |
|------------------------------------|---------------------------------------|-----------------------------------|----------------------------------------|-----------------------------------|-----------------------------------|--------------------------------------|
| Monaco                             | 11.4<br>(6.56-17.6)                   | 33.1<br>(18.7-50.6)               | 14.2<br>(8.27-22.2)                    | 32.7<br>(18.9-50.9)               | 24.5<br>(13.4-36.0)               | -1.29<br>(-10.1-7.48)                |
| Netherlands                        | 3360<br>(1940-5260)                   | 33.3<br>(19.2-52.0)               | 5370<br>(3130-8350)                    | 33.0<br>(19.4-50.9)               | 59.6<br>(44.9-74.7)               | -0.884<br>(-9.40-8.26)               |
| Norway                             | 3260<br>(1980-4860)                   | 107<br>(64.0-159)                 | 4880<br>(2970-7260)                    | 107<br>(64.5-160)                 | 49.8<br>(46.7-52.9)               | 0.126<br>(-1.56-1.96)                |
| Portugal                           | 2480<br>(1430-3830)                   | 32.8<br>(19.0-50.3)               | 3350<br>(1950-5180)                    | 32.7<br>(18.9-50.3)               | 35.1<br>(22.2-48.3)               | -0.485<br>(-9.85-9.37)               |
| San Marino                         | 6.59<br>(3.86-10.1)                   | 33.1<br>(19.0-51.1)               | 9.64<br>(5.53-15.1)                    | 32.7<br>(18.6-51.5)               | 46.3<br>(33.2-59.5)               | -1.11<br>(-9.55-8.03)                |
| Spain                              | 9870<br>(5620-15400)                  | 32.9<br>(18.5-51.1)               | 13400<br>(7700-20800)                  | 32.6<br>(18.6-51.0)               | 35.7<br>(24.3-49.8)               | -0.796<br>(-9.39-9.42)               |
| Sweden                             | 2770<br>(1630-4290)                   | 39.5<br>(22.9-61.0)               | 3860<br>(2260-5980)                    | 39.6<br>(22.8-61.4)               | 39.3<br>(27.0-52.7)               | 0.243<br>(-8.22-9.30)                |
| Switzerland                        | 4920<br>(3030-7160)                   | 97.4<br>(60.1-142)                | 7640<br>(4830-11100)                   | 97.1<br>(60.9-142)                | 55.3<br>(45.2-65.7)               | -0.400<br>(-7.08-6.46)               |
| UK                                 | 20400<br>(12800-29900)                | 48.1<br>(30.0-70.0)               | 27500<br>(17200-39800)                 | 47.3<br>(29.2-68.9)               | 34.6<br>(31.9-37.3)               | -1.55<br>(-3.35-0.266)               |
| <b>Latin America and Caribbean</b> | <b>80300</b><br><b>(48700-120000)</b> | <b>58.6</b><br><b>(35.7-87.4)</b> | <b>155000</b><br><b>(94500-231000)</b> | <b>59.1</b><br><b>(36.0-87.3)</b> | <b>93.5</b><br><b>(90.3-97.0)</b> | <b>0.751</b><br><b>(-0.954-2.44)</b> |
| Andean Latin America               | 10000<br>(5930-15300)                 | 74.1<br>(43.8-113)                | 18800<br>(11300-28600)                 | 71.9<br>(43.1-109)                | 87.8<br>(77.7-99.1)               | -2.91<br>(-8.01-3.04)                |
| Bolivia                            | 1420<br>(818-2210)                    | 68.3<br>(39.5-107)                | 2720<br>(1580-4280)                    | 66.4<br>(38.8-104)                | 91.4<br>(75.8-109)                | -2.79<br>(-10.8-6.19)                |
| Ecuador                            | 3390<br>(2000-5190)                   | 91.4<br>(54.2-140)                | 6280<br>(3730-9770)                    | 88.1<br>(52.7-137)                | 85.6<br>(71.3-102)                | -3.61<br>(-10.9-4.98)                |
| Peru                               | 5230<br>(3000-8190)                   | 67.3<br>(39.0-106)                | 9840<br>(5760-15200)                   | 65.7<br>(38.5-102)                | 88.2<br>(73.8-106)                | -2.35<br>(-9.88-6.77)                |

|                     |                      |                     |                       |                     |                     |                        |
|---------------------|----------------------|---------------------|-----------------------|---------------------|---------------------|------------------------|
| Caribbean           | 8620<br>(5030–13500) | 56.0<br>(32.8–87.5) | 13300<br>(7800–20600) | 55.2<br>(32.2–85.1) | 54.5<br>(47.6–60.9) | -1.59<br>(-6.07–2.42)  |
| Antigua and Barbuda | 14.6<br>(8.49–22.6)  | 57.5<br>(33.3–89.2) | 26.9<br>(15.6–42.2)   | 56.4<br>(33.2–87.9) | 83.9<br>(66.6–101)  | -1.91<br>(-10.0–6.63)  |
| Bahamas             | 48.3<br>(28.1–75.7)  | 57.5<br>(33.5–89.8) | 94.3<br>(55.3–149)    | 56.3<br>(32.9–87.9) | 95.3<br>(80.2–113)  | -2.04<br>(-9.65–6.31)  |
| Barbados            | 77.9<br>(45.0–121)   | 58.6<br>(34.0–92.8) | 133<br>(76.3–206)     | 57.4<br>(33.1–89.0) | 70.3<br>(55.0–89.8) | -2.08<br>(-10.4–7.64)  |
| Belize              | 33.8<br>(19.8–53.0)  | 58.0<br>(33.9–90.8) | 74.7<br>(44.1–116)    | 57.4<br>(33.6–89.3) | 121<br>(101–143)    | -0.959<br>(-9.22–8.09) |
| Bermuda             | 18.6<br>(10.7–28.8)  | 56.1<br>(32.5–87.2) | 32.7<br>(19.0–51.8)   | 55.1<br>(31.9–87.2) | 76.3<br>(61.3–94.5) | -1.76<br>(-9.65–7.76)  |
| Cuba                | 3310<br>(1920–5200)  | 54.9<br>(31.9–86.4) | 4800<br>(2790–7400)   | 53.8<br>(31.2–82.9) | 45.3<br>(33.0–57.5) | -2.17<br>(-10.5–6.16)  |
| Dominica            | 18.9<br>(11.1–30.0)  | 58.1<br>(34.0–91.8) | 25.4<br>(15.1–39.4)   | 56.6<br>(33.8–87.2) | 34.1<br>(22.9–46.3) | -2.55<br>(-9.75–5.41)  |
| Dominican Republic  | 1380<br>(795–2140)   | 54.7<br>(31.5–85.2) | 2320<br>(1350–3600)   | 54.3<br>(31.5–84.1) | 68.5<br>(54.8–84.1) | -0.732<br>(-8.49–8.25) |
| Grenada             | 17.2<br>(10.0–26.9)  | 58.0<br>(34.0–90.2) | 30.3<br>(17.4–47.0)   | 57.4<br>(33.5–88.5) | 76.1<br>(61.9–93.0) | -1.06<br>(-8.24–7.26)  |
| Guyana              | 106<br>(61.7–166)    | 58.7<br>(34.4–91.5) | 158<br>(91.5–249)     | 57.3<br>(33.4–89.8) | 49.6<br>(37.0–62.1) | -2.43<br>(-10.2–5.02)  |
| Haiti               | 1060<br>(606–1670)   | 56.4<br>(32.5–87.9) | 1660<br>(966–2630)    | 55.4<br>(32.2–87.0) | 56.3<br>(43.5–70.1) | -1.89<br>(-9.64–6.14)  |
| Jamaica             | 579<br>(334–907)     | 58.7<br>(33.8–92.1) | 821<br>(479–1280)     | 58.4<br>(34.2–91.1) | 41.8<br>(31.1–55.9) | -0.531<br>(-8.01–9.12) |
| Puerto Rico         | 1220<br>(716–1900)   | 58.5<br>(34.3–90.9) | 1880<br>(1090–2900)   | 57.9<br>(33.7–89.6) | 53.2<br>(40.5–66.5) | -1.17<br>(-9.60–7.66)  |

|                                     |                        |                     |                         |                     |                     |                        |
|-------------------------------------|------------------------|---------------------|-------------------------|---------------------|---------------------|------------------------|
| Saint Kitts and Nevis               | 9.49<br>(5.53–14.7)    | 57.3<br>(33.2–89.6) | 17.5<br>(10.0–27.1)     | 56.3<br>(32.7–87.6) | 84.6<br>(60.7–108)  | -1.72<br>(-10.6–6.46)  |
| Saint Lucia                         | 30.3<br>(17.9–47.8)    | 57.9<br>(34.2–91.5) | 56.3<br>(33.0–87.2)     | 56.1<br>(33.0–86.7) | 86.0<br>(69.9–106)  | -3.11<br>(-10.7–7.16)  |
| Saint Vincent and the<br>Grenadines | 22.2<br>(13.0–35.0)    | 59.6<br>(35.0–93.9) | 41.3<br>(24.4–64.4)     | 58.7<br>(34.4–91.0) | 86.3<br>(70.0–105)  | -1.49<br>(-9.91–7.63)  |
| Suriname                            | 85.3<br>(49.9–132)     | 56.8<br>(33.5–88.0) | 151<br>(87.6–238)       | 56.9<br>(33.0–89.5) | 77.3<br>(63.6–93.4) | 0.222<br>(-7.14–8.73)  |
| Trinidad and Tobago                 | 272<br>(154–423)       | 55.6<br>(31.9–86.3) | 499<br>(288–791)        | 54.5<br>(31.9–86.7) | 83.6<br>(67.2–102)  | -1.86<br>(-10.4–7.64)  |
| Virgin Islands                      | 30.1<br>(17.4–47.8)    | 57.3<br>(33.1–90.2) | 51.1<br>(29.3–80.2)     | 56.4<br>(32.3–88.3) | 69.4<br>(51.4–88.1) | -1.64<br>(-9.85–6.83)  |
| Central Latin America               | 43000<br>(26200–63900) | 81.0<br>(49.5–120)  | 86200<br>(52700–128000) | 81.8<br>(50.2–121)  | 100<br>(95.6–105)   | 0.960<br>(-1.48–3.31)  |
| Colombia                            | 8590<br>(5010–13400)   | 73.0<br>(42.5–113)  | 17400<br>(10100–26900)  | 73.6<br>(42.8–113)  | 102<br>(85.6–121)   | 0.794<br>(-7.62–9.82)  |
| Costa Rica                          | 865<br>(499–1320)      | 74.1<br>(43.0–113)  | 1720<br>(1010–2660)     | 73.7<br>(43.1–113)  | 99.1<br>(82.5–116)  | -0.584<br>(-9.06–7.69) |
| El Salvador                         | 1260<br>(743–1950)     | 74.1<br>(43.7–115)  | 1860<br>(1080–2870)     | 74.8<br>(43.3–116)  | 47.8<br>(37.0–59.7) | 1.02<br>(-6.41–9.25)   |
| Guatemala                           | 1900<br>(1110–2930)    | 74.8<br>(43.8–115)  | 3710<br>(2160–5680)     | 76.6<br>(44.7–117)  | 95.5<br>(79.9–113)  | 2.36<br>(-5.54–11.1)   |
| Honduras                            | 984<br>(577–1520)      | 74.2<br>(43.5–114)  | 2030<br>(1200–3130)     | 74.9<br>(44.5–115)  | 106<br>(89.4–125)   | 0.932<br>(-7.39–9.80)  |
| Mexico                              | 23500<br>(14700–34500) | 88.0<br>(55.5–129)  | 46700<br>(29200–68400)  | 89.0<br>(55.9–131)  | 98.3<br>(94.7–102)  | 1.23<br>(-0.530–2.94)  |
| Nicaragua                           | 726<br>(429–1120)      | 73.7<br>(43.7–114)  | 1380<br>(816–2150)      | 74.7<br>(44.1–114)  | 90.6<br>(75.6–109)  | 1.35<br>(-6.28–10.5)   |



|                                     |                                |                             |                                |                             |                             |                               |
|-------------------------------------|--------------------------------|-----------------------------|--------------------------------|-----------------------------|-----------------------------|-------------------------------|
| Panama                              | 734<br>(427-1130)              | 74.3<br>(43.2-115)          | 1480<br>(877-2300)             | 74.9<br>(44.3-116)          | 102<br>(87.0-118)           | 0.880<br>(-6.65-8.72)         |
| Venezuela                           | 4430<br>(2590-6840)            | 75.0<br>(44.0-116)          | 10000<br>(5890-15300)          | 75.6<br>(44.9-116)          | 126<br>(108-146)            | 0.742<br>(-7.14-9.87)         |
| <b>Tropical Latin America</b>       | <b>18600<br/>(11500-27500)</b> | <b>33.7<br/>(20.9-49.8)</b> | <b>36900<br/>(22700-54700)</b> | <b>34.3<br/>(21.0-50.3)</b> | <b>98.8<br/>(93.1-105)</b>  | <b>1.75<br/>(-1.05-4.84)</b>  |
| Brazil                              | 18100<br>(11200-26700)         | 33.6<br>(20.8-49.6)         | 36000<br>(22100-53200)         | 34.2<br>(20.9-50.1)         | 99.0<br>(93.1-105)          | 1.76<br>(-1.20-4.99)          |
| Paraguay                            | 519<br>(305-814)               | 38.0<br>(22.3-59.5)         | 989<br>(576-1550)              | 38.8<br>(22.8-60.8)         | 90.6<br>(73.5-108)          | 2.14<br>(-6.71-11.6)          |
| <b>North Africa and Middle East</b> | <b>21600<br/>(12500-33700)</b> | <b>19.5<br/>(11.2-30.1)</b> | <b>40600<br/>(23300-63400)</b> | <b>19.6<br/>(11.4-30.3)</b> | <b>88.1<br/>(80.9-95.7)</b> | <b>0.605<br/>(-2.57-4.15)</b> |
| Afghanistan                         | 772<br>(449-1220)              | 19.3<br>(11.4-30.1)         | 949<br>(537-1480)              | 19.6<br>(11.2-30.7)         | 22.9<br>(7.60-41.0)         | 1.60<br>(-9.53-12.5)          |
| Algeria                             | 1540<br>(889-2400)             | 19.4<br>(11.4-30.3)         | 3230<br>(1850-5060)            | 19.5<br>(11.2-30.0)         | 110<br>(89.8-132)           | 0.662<br>(-8.96-10.2)         |
| Bahrain                             | 24.8<br>(14.2-39.6)            | 21.2<br>(12.3-33.3)         | 127<br>(69.0-202)              | 21.0<br>(12.1-32.8)         | 410<br>(343-472)            | -0.919<br>(-11.5-7.57)        |
| Egypt                               | 3530<br>(1990-5570)            | 19.4<br>(10.9-30.2)         | 6500<br>(3700-10300)           | 19.7<br>(11.2-30.8)         | 84.1<br>(66.2-105)          | 1.14<br>(-8.12-11.3)          |
| Iran                                | 3770<br>(2130-5930)            | 20.1<br>(11.5-31.3)         | 7050<br>(4060-11000)           | 20.4<br>(11.8-31.8)         | 87.1<br>(74.3-103)          | 1.42<br>(-3.67-8.20)          |
| Iraq                                | 978<br>(586-1520)              | 20.2<br>(12.0-31.4)         | 2120<br>(1210-3390)            | 20.5<br>(11.8-32.1)         | 117<br>(96.0-141)           | 1.62<br>(-7.54-11.8)          |
| Jordan                              | 218<br>(124-344)               | 23.2<br>(13.3-35.9)         | 731<br>(417-1140)              | 22.9<br>(12.9-35.6)         | 236<br>(202-275)            | -1.22<br>(-9.85-8.83)         |
| Kuwait                              | 101<br>(58.5-158)              | 20.0<br>(11.6-31.0)         | 267<br>(152-425)               | 19.7<br>(11.4-30.9)         | 165<br>(134-199)            | -1.41<br>(-11.1-9.26)         |

|                      |                                         |                                   |                                         |                                   |                                   |                                      |
|----------------------|-----------------------------------------|-----------------------------------|-----------------------------------------|-----------------------------------|-----------------------------------|--------------------------------------|
| Lebanon              | 317<br>(182–506)                        | 19.2<br>(11.0–30.2)               | 440<br>(258–695)                        | 18.9<br>(11.0–29.5)               | 38.7<br>(24.0–53.8)               | -1.87<br>(-11.8–8.73)                |
| Libya                | 234<br>(132–364)                        | 19.4<br>(11.1–30.3)               | 450<br>(260–700)                        | 19.2<br>(11.2–29.8)               | 92.1<br>(70.2–115)                | -1.16<br>(-11.2–9.37)                |
| Morocco              | 1640<br>(950–2550)                      | 19.4<br>(11.2–29.8)               | 2940<br>(1670–4640)                     | 19.5<br>(11.1–29.8)               | 78.9<br>(60.3–101)                | 0.522<br>(-9.09–11.3)                |
| Oman                 | 83.9<br>(48.0–133)                      | 19.9<br>(11.6–31.2)               | 179<br>(101–286)                        | 20.4<br>(12.0–31.6)               | 113<br>(89.7–139)                 | 2.54<br>(-6.63–12.7)                 |
| Palestine            | 96.5<br>(55.5–153)                      | 19.4<br>(11.1–30.4)               | 208<br>(119–331)                        | 19.6<br>(11.4–30.7)               | 116<br>(93.0–142)                 | 1.36<br>(-8.26–12.0)                 |
| Qatar                | 24.1<br>(13.5–39.1)                     | 21.2<br>(12.4–33.7)               | 144<br>(79.3–235)                       | 20.9<br>(12.0–32.4)               | 497<br>(424–581)                  | -1.80<br>(-10.5–8.11)                |
| Saudi Arabia         | 828<br>(472–1300)                       | 19.1<br>(10.9–29.9)               | 1740<br>(986–2720)                      | 19.0<br>(11.0–29.0)               | 110<br>(89.2–134)                 | -0.789<br>(-9.19–9.11)               |
| Sudan                | 1140<br>(654–1790)                      | 19.0<br>(10.9–29.6)               | 1780<br>(1030–2770)                     | 19.0<br>(11.0–29.8)               | 56.1<br>(39.7–72.4)               | 0.358<br>(-9.81–9.74)                |
| Syria                | 655<br>(372–1060)                       | 19.0<br>(10.9–30.1)               | 1180<br>(669–1830)                      | 18.8<br>(10.9–29.1)               | 79.4<br>(61.9–99.0)               | -1.07<br>(-10.0–9.16)                |
| Tunisia              | 660<br>(375–1050)                       | 19.2<br>(11.0–30.3)               | 1190<br>(683–1880)                      | 19.3<br>(11.2–30.0)               | 80.2<br>(61.8–101)                | 0.400<br>(-9.28–11.3)                |
| Turkey               | 4280<br>(2420–6630)                     | 19.2<br>(10.9–29.6)               | 7740<br>(4490–12100)                    | 18.9<br>(11.0–29.6)               | 81.0<br>(61.3–102)                | -1.18<br>(-11.1–10.1)                |
| United Arab Emirates | 78.1<br>(42.0–127)                      | 20.0<br>(11.5–31.4)               | 462<br>(252–752)                        | 19.9<br>(11.7–30.9)               | 491<br>(406–589)                  | -0.556<br>(-9.44–8.72)               |
| Yemen                | 594<br>(339–949)                        | 18.9<br>(11.0–29.6)               | 1130<br>(631–1780)                      | 18.9<br>(10.7–29.1)               | 90.4<br>(71.4–113)                | -0.0670<br>(-9.39–10.6)              |
| <b>South Asia</b>    | <b>218000</b><br><b>(129000–334000)</b> | <b>63.2</b><br><b>(37.1–95.7)</b> | <b>418000</b><br><b>(245000–641000)</b> | <b>63.6</b><br><b>(37.5–96.5)</b> | <b>91.5</b><br><b>(87.3–96.4)</b> | <b>0.654</b><br><b>(-0.932–2.40)</b> |

|                                               |                                   |                             |                                   |                             |                             |                              |
|-----------------------------------------------|-----------------------------------|-----------------------------|-----------------------------------|-----------------------------|-----------------------------|------------------------------|
| Bangladesh                                    | 13700<br>(8020–21000)             | 46.0<br>(27.2–71.1)         | 31200<br>(18300–47300)            | 46.5<br>(27.1–70.5)         | 129<br>(108–148)            | 0.967<br>(-7.25–9.07)        |
| Bhutan                                        | 73.7<br>(42.7–116)                | 45.9<br>(26.9–71.5)         | 130<br>(75.0–200)                 | 47.1<br>(27.5–72.8)         | 76.2<br>(61.2–92.7)         | 2.62<br>(-5.59–12.0)         |
| India                                         | 186000<br>(109000–285000)         | 67.7<br>(39.8–102)          | 356000<br>(209000–544000)         | 67.4<br>(39.7–102)          | 90.9<br>(86.4–96.1)         | -0.383<br>(-2.05–1.38)       |
| Nepal                                         | 2370<br>(1430–3450)               | 39.3<br>(23.9–57.1)         | 4320<br>(2610–6410)               | 40.6<br>(24.7–60.1)         | 82.7<br>(68.5–101)          | 3.46<br>(-4.48–12.6)         |
| Pakistan                                      | 15800<br>(9170–24400)             | 48.7<br>(28.3–76.1)         | 26600<br>(15600–41100)            | 51.2<br>(30.0–79.7)         | 67.9<br>(58.0–77.8)         | 5.04<br>(-0.476–10.7)        |
| <b>Southeast Asia, east Asia, and Oceania</b> | <b>317000<br/>(190000–482000)</b> | <b>49.3<br/>(29.3–74.6)</b> | <b>614000<br/>(366000–927000)</b> | <b>50.2<br/>(29.9–76.3)</b> | <b>93.8<br/>(90.5–97.4)</b> | <b>1.88<br/>(0.421–3.26)</b> |
| East Asia                                     | 217000<br>(128000–334000)         | 44.3<br>(26.2–67.4)         | 427000<br>(254000–656000)         | 45.0<br>(26.7–68.9)         | 97.3<br>(93.1–102)          | 1.59<br>(-0.183–3.27)        |
| China                                         | 204000<br>(121000–316000)         | 43.3<br>(25.6–65.9)         | 406000<br>(241000–623000)         | 44.0<br>(26.1–67.5)         | 98.7<br>(94.3–103)          | 1.75<br>(0.00198–3.52)       |
| North Korea                                   | 3810<br>(2150–5970)               | 60.0<br>(34.1–93.7)         | 6850<br>(4010–10500)              | 61.0<br>(35.4–94.0)         | 79.9<br>(62.5–96.1)         | 1.71<br>(-6.13–9.64)         |
| Taiwan (province of China)                    | 8510<br>(5010–12900)              | 77.3<br>(45.9–117)          | 14400<br>(8600–21800)             | 77.9<br>(46.3–118)          | 69.5<br>(56.1–82.6)         | 0.848<br>(-6.07–7.53)        |
| Oceania                                       | 1020<br>(592–1560)                | 62.5<br>(36.1–95.5)         | 1920<br>(1120–2940)               | 64.4<br>(38.0–98.0)         | 89.0<br>(78.4–101)          | 2.98<br>(-2.57–8.50)         |
| American Samoa                                | 8.06<br>(4.69–12.3)               | 60.6<br>(35.0–91.8)         | 13.3<br>(7.84–20.1)               | 62.5<br>(37.3–95.6)         | 64.5<br>(50.4–77.3)         | 3.05<br>(-5.34–9.75)         |
| Cook Islands                                  | 5.14<br>(2.97–7.90)               | 63.8<br>(37.0–97.2)         | 8.17<br>(4.74–12.3)               | 66.0<br>(38.2–99.8)         | 58.9<br>(45.3–71.0)         | 3.40<br>(-4.94–10.5)         |
| Fiji                                          | 126<br>(73.3–193)                 | 72.3<br>(42.7–110)          | 225<br>(131–343)                  | 72.6<br>(42.6–109)          | 78.3<br>(63.5–93.5)         | 0.488<br>(-7.06–8.48)        |

|                                  |                        |                     |                        |                     |                        |                      |
|----------------------------------|------------------------|---------------------|------------------------|---------------------|------------------------|----------------------|
| Guam                             | 29.7<br>(17.2-45.7)    | 60.8<br>(35.2-93.1) | 55.4<br>(32.2-85.7)    | 62.8<br>(36.5-97.3) | 86.4<br>(73.1-103)     | 3.24<br>(-3.76-11.6) |
| Kiribati                         | 10.1<br>(5.84-15.3)    | 67.9<br>(39.6-104)  | 16.0<br>(9.35-24.4)    | 69.5<br>(40.9-105)  | 58.4<br>(44.4-73.6)    | 2.34<br>(-4.56-9.31) |
| Marshall Islands                 | 4.58<br>(2.70-6.99)    | 61.0<br>(35.6-93.6) | 9.15<br>(5.25-14.2)    | 63.0<br>(37.0-96.3) | 99.6<br>(81.5-118)     | 3.33<br>(-4.55-11.0) |
| Micronesia (Federated States of) | 12.9<br>(7.60-19.8)    | 63.5<br>(36.9-98.0) | 17.8<br>(10.4-27.2)    | 65.8<br>(38.9-100)  | 38.4<br>(24.7-54.0)    | 3.57<br>(-3.67-11.2) |
| Nauru                            | 0.843<br>(0.480-1.29)  | 62.9<br>(36.6-96.1) | 0.795<br>(0.453-1.23)  | 65.4<br>(37.8-98.8) | -5.73<br>(-14.2-3.76)  | 3.90<br>(-3.26-11.7) |
| Niue                             | 0.631<br>(0.368-0.969) | 63.8<br>(37.0-96.9) | 0.627<br>(0.361-0.950) | 66.1<br>(38.4-100)  | -0.704<br>(-8.39-7.83) | 3.48<br>(-3.59-11.5) |
| Northern Mariana Islands         | 6.14<br>(3.61-9.21)    | 61.1<br>(35.6-92.4) | 15.0<br>(8.68-22.8)    | 62.7<br>(36.8-96.4) | 144<br>(121-169)       | 2.66<br>(-5.62-10.7) |
| Palau                            | 3.73<br>(2.21-5.70)    | 63.7<br>(37.3-97.5) | 6.08<br>(3.56-9.52)    | 65.9<br>(38.7-99.7) | 63.1<br>(49.3-79.0)    | 3.34<br>(-3.89-12.4) |
| Papua New Guinea                 | 626<br>(362-969)       | 61.1<br>(35.2-93.6) | 1270<br>(726-1940)     | 63.2<br>(36.9-96.7) | 103<br>(85.4-121)      | 3.44<br>(-4.89-11.4) |
| Samoa                            | 29.1<br>(17.1-44.8)    | 62.1<br>(36.5-94.3) | 40.3<br>(23.4-61.3)    | 63.9<br>(37.6-97.3) | 38.4<br>(25.6-50.7)    | 2.87<br>(-5.51-10.3) |
| Solomon Islands                  | 54.3<br>(31.2-83.9)    | 62.1<br>(36.1-95.3) | 79.7<br>(46.6-121)     | 65.1<br>(38.4-99.0) | 46.9<br>(35.8-61.9)    | 4.84<br>(-2.18-14.9) |
| Tokelau                          | 0.341<br>(0.196-0.519) | 62.9<br>(36.0-95.4) | 0.428<br>(0.251-0.653) | 65.5<br>(38.5-99.1) | 25.3<br>(14.8-36.4)    | 4.04<br>(-3.61-12.5) |
| Tonga                            | 19.3<br>(11.1-29.7)    | 64.2<br>(37.3-97.7) | 23.2<br>(13.5-35.5)    | 67.0<br>(39.0-102)  | 20.3<br>(11.8-29.4)    | 4.30<br>(-2.54-12.2) |
| Tuvalu                           | 2.06<br>(1.20-3.21)    | 63.0<br>(37.0-97.2) | 2.88<br>(1.69-4.35)    | 65.1<br>(38.7-99.1) | 39.8<br>(29.5-51.2)    | 3.40<br>(-4.03-11.0) |

|                |                         |                     |                           |                     |                     |                       |
|----------------|-------------------------|---------------------|---------------------------|---------------------|---------------------|-----------------------|
| Vanuatu        | 23.0<br>(13.4–35.4)     | 58.8<br>(34.2–90.2) | 51.1<br>(29.5–78.7)       | 62.1<br>(35.5–95.4) | 122<br>(104–141)    | 5.55<br>(-2.44–14.2)  |
| Southeast Asia | 98900<br>(58300–148000) | 68.7<br>(41.1–103)  | 184000<br>(108000–277000) | 69.7<br>(41.8–104)  | 86.3<br>(81.3–91.7) | 1.56<br>(-0.551–3.68) |
| Cambodia       | 1420<br>(831–2160)      | 62.9<br>(37.1–96.3) | 2920<br>(1710–4430)       | 64.2<br>(37.7–97.4) | 105<br>(89.8–125)   | 2.10<br>(-5.16–11.0)  |
| Indonesia      | 39800<br>(23600–59900)  | 71.2<br>(42.7–107)  | 69700<br>(41200–105000)   | 72.9<br>(44.0–109)  | 75.1<br>(69.5–81.3) | 2.41<br>(-0.714–5.34) |
| Laos           | 724<br>(422–1110)       | 64.1<br>(37.2–97.4) | 1260<br>(721–1930)        | 65.8<br>(38.0–101)  | 73.6<br>(59.1–88.5) | 2.66<br>(-5.04–10.9)  |
| Malaysia       | 3720<br>(2140–5680)     | 64.8<br>(37.9–97.8) | 8570<br>(4960–13200)      | 66.3<br>(38.4–102)  | 131<br>(114–152)    | 2.34<br>(-4.70–10.7)  |
| Maldives       | 45.8<br>(26.7–70.4)     | 63.7<br>(37.5–97.3) | 92.9<br>(53.7–141)        | 65.2<br>(37.9–99.4) | 103<br>(83.9–124)   | 2.32<br>(-5.91–10.9)  |
| Mauritius      | 263<br>(154–398)        | 66.3<br>(38.3–101)  | 585<br>(343–894)          | 72.5<br>(42.4–110)  | 122<br>(104–142)    | 9.39<br>(0.568–18.7)  |
| Myanmar        | 7660<br>(4470–11600)    | 62.5<br>(36.6–95.8) | 12200<br>(7100–18800)     | 64.7<br>(38.0–100)  | 59.5<br>(47.4–74.5) | 3.45<br>(-3.94–12.5)  |
| Philippines    | 10300<br>(5960–15500)   | 58.8<br>(34.3–89.1) | 19700<br>(11400–29900)    | 59.6<br>(34.8–90.6) | 91.5<br>(87.1–95.9) | 1.23<br>(-0.344–2.90) |
| Seychelles     | 17.3<br>(10.2–26.6)     | 63.2<br>(37.4–96.6) | 32.2<br>(18.7–49.3)       | 64.7<br>(37.6–99.4) | 86.0<br>(68.5–105)  | 2.42<br>(-6.10–12.2)  |
| Sri Lanka      | 4050<br>(2350–6090)     | 63.6<br>(37.4–95.9) | 7620<br>(4400–11800)      | 66.1<br>(38.3–101)  | 88.4<br>(74.1–105)  | 3.93<br>(-3.41–12.6)  |
| Thailand       | 13800<br>(7980–21200)   | 64.1<br>(37.5–98.2) | 30000<br>(17600–45700)    | 64.2<br>(38.0–99.1) | 118<br>(100–135)    | 0.191<br>(-7.61–8.10) |
| Timor-Leste    | 116<br>(67.3–177)       | 61.0<br>(35.7–92.9) | 250<br>(145–383)          | 63.3<br>(36.7–96.5) | 115<br>(96.8–137)   | 3.88<br>(-4.07–12.4)  |

|                                  |                                      |                                   |                                      |                                   |                                   |                                     |
|----------------------------------|--------------------------------------|-----------------------------------|--------------------------------------|-----------------------------------|-----------------------------------|-------------------------------------|
| Vietnam                          | 16900<br>(10200–25200)               | 81·9<br>(49·6–122)                | 31100<br>(18400–47300)               | 83·8<br>(50·7–126)                | 83·9<br>(67·5–101)                | 2·41<br>(-5·02–9·13)                |
| <b>Sub-Saharan Africa</b>        | <b>28300</b><br><b>(16500–44000)</b> | <b>23·8</b><br><b>(13·8–36·9)</b> | <b>46100</b><br><b>(26600–72000)</b> | <b>23·8</b><br><b>(13·7–36·8)</b> | <b>63·0</b><br><b>(59·8–66·2)</b> | <b>0·341</b><br><b>(-1·05–1·76)</b> |
| Central sub-Saharan Africa       | 2490<br>(1430–3910)                  | 21·7<br>(12·6–33·9)               | 4520<br>(2570–7240)                  | 21·8<br>(12·6–34·1)               | 81·4<br>(66·9–96·6)               | 0·267<br>(-6·49–7·54)               |
| Angola                           | 459<br>(266–723)                     | 21·5<br>(12·6–33·1)               | 951<br>(541–1490)                    | 21·7<br>(12·4–33·6)               | 107<br>(84·4–132)                 | 1·29<br>(-7·81–13·2)                |
| Central African Republic         | 114<br>(65·5–184)                    | 21·6<br>(12·6–34·5)               | 173<br>(97·9–275)                    | 21·7<br>(12·4–34·0)               | 51·6<br>(33·9–69·3)               | 0·265<br>(-8·89–9·27)               |
| Congo                            | 116<br>(66·8–182)                    | 22·1<br>(12·7–34·7)               | 241<br>(138–382)                     | 22·0<br>(12·6–34·6)               | 108<br>(87·4–130)                 | -0·195<br>(-8·78–8·29)              |
| Democratic Republic of the Congo | 1720<br>(976–2720)                   | 21·7<br>(12·5–34·1)               | 3020<br>(1710–4860)                  | 21·8<br>(12·6–33·9)               | 75·0<br>(56·8–95·0)               | 0·0168<br>(-9·66–10·4)              |
| Equatorial Guinea                | 19·9<br>(11·3–31·8)                  | 21·9<br>(12·4–34·2)               | 39·0<br>(22·4–60·6)                  | 22·3<br>(12·9–34·4)               | 95·9<br>(74·5–120)                | 1·44<br>(-8·69–12·7)                |
| Gabon                            | 60·1<br>(34·8–93·7)                  | 22·3<br>(13·1–34·6)               | 100<br>(57·3–158)                    | 22·3<br>(13·0–34·6)               | 67·2<br>(51·2–84·8)               | -0·102<br>(-8·39–9·51)              |
| Eastern sub-Saharan Africa       | 9390<br>(5510–14600)                 | 23·0<br>(13·3–35·8)               | 15900<br>(9170–24800)                | 23·0<br>(13·2–35·5)               | 69·7<br>(64·1–75·2)               | -0·00958<br>(-2·85–3·02)            |
| Burundi                          | 233<br>(134–357)                     | 22·1<br>(12·7–34·2)               | 465<br>(263–743)                     | 22·0<br>(12·7–34·5)               | 99·8<br>(81·7–122)                | -0·552<br>(-8·45–8·94)              |
| Comoros                          | 28·2<br>(16·4–43·9)                  | 22·2<br>(13·0–34·3)               | 45·6<br>(26·0–70·6)                  | 22·1<br>(12·6–34·3)               | 61·6<br>(45·0–78·6)               | -0·422<br>(-10·3–9·40)              |
| Djibouti                         | 22·3<br>(12·6–34·7)                  | 22·3<br>(12·9–34·9)               | 64·1<br>(36·1–102)                   | 22·3<br>(12·7–34·8)               | 187<br>(160–222)                  | 0·0294<br>(-9·21–10·3)              |
| Eritrea                          | 97·1<br>(54·2–155)                   | 22·0<br>(12·9–34·4)               | 202<br>(113–322)                     | 21·8<br>(12·7–34·2)               | 108<br>(86·6–131)                 | -0·780<br>(-9·88–9·05)              |

|                             |                     |                     |                      |                     |                     |                        |
|-----------------------------|---------------------|---------------------|----------------------|---------------------|---------------------|------------------------|
| Ethiopia                    | 2860<br>(1640-4480) | 23.2<br>(13.5-36.1) | 4470<br>(2620-6990)  | 23.1<br>(13.6-35.8) | 56.3<br>(42.1-69.6) | -0.553<br>(-8.55-7.15) |
| Kenya                       | 1280<br>(745-2010)  | 27.1<br>(15.8-42.2) | 2510<br>(1460-3940)  | 27.0<br>(15.6-42.0) | 96.8<br>(91.5-102)  | -0.337<br>(-2.27-1.60) |
| Madagascar                  | 567<br>(327-905)    | 22.1<br>(12.8-35.2) | 1010<br>(567-1590)   | 22.0<br>(12.8-34.6) | 78.2<br>(60.3-100)  | -0.190<br>(-9.52-10.7) |
| Malawi                      | 405<br>(233-635)    | 22.0<br>(12.7-34.3) | 630<br>(365-1000)    | 21.9<br>(12.9-34.0) | 55.8<br>(41.6-73.6) | -0.260<br>(-9.10-10.8) |
| Mozambique                  | 641<br>(366-1010)   | 21.7<br>(12.5-34.0) | 938<br>(540-1480)    | 21.8<br>(12.5-34.1) | 46.3<br>(31.5-62.6) | 0.154<br>(-9.49-10.1)  |
| Rwanda                      | 230<br>(134-359)    | 22.0<br>(13.0-33.8) | 500<br>(291-791)     | 21.9<br>(12.8-34.0) | 118<br>(95.3-143)   | -0.533<br>(-10.2-9.60) |
| Somalia                     | 277<br>(159-435)    | 22.2<br>(12.8-34.2) | 519<br>(290-820)     | 22.1<br>(12.6-34.6) | 87.3<br>(69.1-107)  | -0.210<br>(-7.93-8.81) |
| South Sudan                 | 291<br>(172-455)    | 21.8<br>(12.9-34.0) | 399<br>(234-623)     | 21.8<br>(12.9-34.0) | 36.8<br>(23.9-52.3) | 0.237<br>(-8.74-10.6)  |
| Uganda                      | 733<br>(422-1160)   | 22.2<br>(12.8-34.8) | 1200<br>(686-1890)   | 22.1<br>(12.8-34.5) | 64.1<br>(47.8-80.6) | -0.455<br>(-9.29-8.99) |
| Tanzania                    | 1370<br>(770-2150)  | 22.0<br>(12.6-34.2) | 2350<br>(1330-3720)  | 22.0<br>(12.4-34.3) | 72.1<br>(55.6-91.7) | 0.188<br>(-9.45-11.3)  |
| Zambia                      | 354<br>(201-552)    | 22.3<br>(12.8-34.9) | 611<br>(349-958)     | 22.3<br>(12.8-35.0) | 72.2<br>(55.6-91.4) | 0.230<br>(-8.87-9.72)  |
| Southern sub-Saharan Africa | 4670<br>(2710-7390) | 34.1<br>(19.7-53.5) | 7640<br>(4500-12000) | 34.6<br>(20.2-53.5) | 63.5<br>(58.6-69.3) | 1.60<br>(-1.17-4.82)   |
| Botswana                    | 124<br>(71.3-193)   | 42.1<br>(24.3-65.1) | 222<br>(127-344)     | 42.4<br>(24.3-65.6) | 78.7<br>(63.8-96.3) | 0.708<br>(-7.05-9.35)  |
| Eswatini                    | 50.1<br>(29.1-78.6) | 33.9<br>(19.9-53.3) | 70.5<br>(40.5-110)   | 34.6<br>(20.0-53.9) | 40.7<br>(27.1-55.3) | 2.00<br>(-6.74-12.5)   |

|                            |                       |                     |                        |                     |                     |                        |
|----------------------------|-----------------------|---------------------|------------------------|---------------------|---------------------|------------------------|
| Lesotho                    | 139<br>(79·6–219)     | 32·8<br>(18·9–50·9) | 156<br>(90·2–245)      | 33·7<br>(19·8–52·5) | 11·7<br>(2·03–22·0) | 2·75<br>(-5·20–11·4)   |
| Namibia                    | 129<br>(74·7–200)     | 32·6<br>(18·9–50·8) | 175<br>(101–279)       | 32·2<br>(18·6–50·2) | 36·4<br>(23·6–49·6) | -1·25<br>(-10·2–8·11)  |
| South Africa               | 3540<br>(2060–5620)   | 34·3<br>(19·9–54·0) | 6180<br>(3620–9730)    | 34·8<br>(20·2–53·8) | 74·2<br>(68·3–81·6) | 1·38<br>(-2·12–4·94)   |
| Zimbabwe                   | 685<br>(391–1090)     | 32·3<br>(18·6–50·5) | 841<br>(488–1330)      | 32·6<br>(19·0–51·3) | 22·7<br>(11·9–35·0) | 0·850<br>(-7·59–10·3)  |
| Western sub-Saharan Africa | 11700<br>(6800–18300) | 22·1<br>(12·8–34·2) | 18000<br>(10400–28200) | 22·2<br>(12·7–34·3) | 53·5<br>(50·2–57·6) | 0·276<br>(-1·45–2·34)  |
| Benin                      | 240<br>(140–381)      | 21·5<br>(12·7–34·0) | 446<br>(256–696)       | 21·7<br>(12·5–33·9) | 85·6<br>(67·5–107)  | 0·740<br>(-8·92–11·1)  |
| Burkina Faso               | 513<br>(294–795)      | 21·5<br>(12·4–33·4) | 812<br>(475–1280)      | 21·7<br>(12·5–33·6) | 58·2<br>(43·1–74·1) | 1·18<br>(-7·94–10·4)   |
| Cabo Verde                 | 24·2<br>(13·9–38·1)   | 21·9<br>(12·5–34·4) | 36·9<br>(21·2–58·1)    | 21·9<br>(12·6–34·7) | 52·5<br>(35·5–73·1) | 0·224<br>(-8·38–9·43)  |
| Cameroon                   | 593<br>(334–943)      | 21·6<br>(12·4–34·1) | 1140<br>(657–1810)     | 22·0<br>(12·7–34·5) | 91·9<br>(73·1–112)  | 1·57<br>(-7·36–11·1)   |
| Chad                       | 340<br>(196–531)      | 21·4<br>(12·4–33·4) | 608<br>(347–952)       | 21·7<br>(12·4–33·9) | 78·7<br>(61·6–96·8) | 1·10<br>(-7·99–10·2)   |
| Côte d'Ivoire              | 590<br>(339–935)      | 21·8<br>(12·6–34·4) | 1060<br>(596–1680)     | 21·8<br>(12·5–33·9) | 80·2<br>(63·0–101)  | 0·212<br>(-8·37–10·2)  |
| The Gambia                 | 55·1<br>(30·9–87·0)   | 21·6<br>(12·1–34·0) | 92·0<br>(51·7–147)     | 21·6<br>(12·3–34·5) | 67·0<br>(50·2–84·2) | -0·210<br>(-9·52–9·18) |
| Ghana                      | 846<br>(475–1340)     | 21·9<br>(12·5–34·5) | 1420<br>(800–2210)     | 22·1<br>(12·7–34·1) | 67·9<br>(51·4–88·3) | 1·04<br>(-8·10–12·0)   |
| Guinea                     | 448<br>(258–705)      | 21·7<br>(12·5–33·7) | 570<br>(324–888)       | 21·6<br>(12·4–33·6) | 27·2<br>(14·3–40·1) | -0·211<br>(-9·24–9·51) |



|                       |                     |                     |                      |                     |                     |                         |
|-----------------------|---------------------|---------------------|----------------------|---------------------|---------------------|-------------------------|
| Guinea-Bissau         | 41.7<br>(24.4–66.1) | 21.9<br>(12.8–34.4) | 62.6<br>(36.1–99.4)  | 21.9<br>(12.6–34.8) | 50.0<br>(34.3–66.2) | 0.0311<br>(-9.65–9.90)  |
| Liberia               | 136<br>(79.1–213)   | 21.5<br>(12.6–33.5) | 197<br>(114–309)     | 21.5<br>(12.6–34.0) | 45.2<br>(30.2–61.3) | 0.112<br>(-9.13–9.64)   |
| Mali                  | 529<br>(306–839)    | 21.6<br>(12.5–34.3) | 893<br>(505–1390)    | 21.7<br>(12.5–33.7) | 68.9<br>(52.2–87.4) | 0.464<br>(-8.73–10.8)   |
| Mauritania            | 124<br>(72.4–195)   | 22.0<br>(12.9–34.4) | 220<br>(127–344)     | 22.0<br>(12.7–34.1) | 76.6<br>(59.5–93.6) | 0.00648<br>(-9.38–8.87) |
| Niger                 | 376<br>(212–595)    | 21.6<br>(12.5–34.0) | 760<br>(437–1220)    | 21.8<br>(12.6–34.1) | 102<br>(82.6–125)   | 0.911<br>(-7.98–10.8)   |
| Nigeria               | 6070<br>(3520–9510) | 22.6<br>(13.2–35.0) | 8310<br>(4840–13000) | 22.6<br>(13.1–34.9) | 36.8<br>(33.1–40.9) | 0.164<br>(-2.01–2.23)   |
| São Tomé and Príncipe | 7.24<br>(4.16–11.5) | 21.5<br>(12.4–33.8) | 9.76<br>(5.59–15.4)  | 21.4<br>(12.3–33.8) | 34.9<br>(20.5–52.0) | -0.359<br>(-10.0–10.6)  |
| Senegal               | 440<br>(252–690)    | 21.7<br>(12.6–34.0) | 740<br>(427–1150)    | 21.8<br>(12.6–34.2) | 68.2<br>(50.3–86.8) | 0.631<br>(-9.34–11.1)   |
| Sierra Leone          | 216<br>(125–341)    | 21.4<br>(12.5–33.6) | 356<br>(200–556)     | 21.7<br>(12.4–33.8) | 64.6<br>(48.5–82.8) | 1.20<br>(-8.40–11.1)    |
| Togo                  | 149<br>(84.8–235)   | 21.5<br>(12.6–33.5) | 296<br>(169–467)     | 21.7<br>(12.5–34.1) | 99.2<br>(78.9–121)  | 0.721<br>(-7.92–10.5)   |

18

19

20 Table 6. Guideline for Accurate and Transparent Health Estimates Reporting (GATHER) checklist.

| Item #                                                                                                | Checklist item                                                                                                                                                                                                                                                                                                                                                                            | Reported on page #                                                                                                                                                                                              |
|-------------------------------------------------------------------------------------------------------|-------------------------------------------------------------------------------------------------------------------------------------------------------------------------------------------------------------------------------------------------------------------------------------------------------------------------------------------------------------------------------------------|-----------------------------------------------------------------------------------------------------------------------------------------------------------------------------------------------------------------|
| <b>Objectives and funding</b>                                                                         |                                                                                                                                                                                                                                                                                                                                                                                           |                                                                                                                                                                                                                 |
| 1                                                                                                     | Define the indicator(s), populations (including age, sex, and geographic entities), and time period(s) for which estimates were made.                                                                                                                                                                                                                                                     | Age: p 11<br>Sex: NR<br>Locations: Appendix pp 1-7<br>Time: p 2, p 4                                                                                                                                            |
| 2                                                                                                     | List the funding sources for the work.                                                                                                                                                                                                                                                                                                                                                    | p 3                                                                                                                                                                                                             |
| <b>Data Inputs</b>                                                                                    |                                                                                                                                                                                                                                                                                                                                                                                           |                                                                                                                                                                                                                 |
| <i>For all data inputs from multiple sources that are synthesized as part of the study:</i>           |                                                                                                                                                                                                                                                                                                                                                                                           |                                                                                                                                                                                                                 |
| 3                                                                                                     | Describe how the data were identified and how the data were accessed.                                                                                                                                                                                                                                                                                                                     | p 9                                                                                                                                                                                                             |
| 4                                                                                                     | Specify the inclusion and exclusion criteria. Identify all ad-hoc exclusions.                                                                                                                                                                                                                                                                                                             | p 10                                                                                                                                                                                                            |
| 5                                                                                                     | Provide information on all included data sources and their main characteristics. For each data source used, report reference information or contact name/institution, population represented, data collection method, year(s) of data collection, sex and age range, diagnostic criteria or measurement method, and sample size, as relevant.                                             | p 9<br>Appendix Table S3<br>Global Health Data Exchange (GHDx,<br><a href="http://ghdx.healthdata.org/">http://ghdx.healthdata.org/</a> )                                                                       |
| 6                                                                                                     | Identify and describe any categories of input data that have potentially important biases (e.g., based on characteristics listed in item 5).                                                                                                                                                                                                                                              | pp 9-10                                                                                                                                                                                                         |
| <i>For data inputs that contribute to the analysis but were not synthesized as part of the study:</i> |                                                                                                                                                                                                                                                                                                                                                                                           |                                                                                                                                                                                                                 |
| 7                                                                                                     | Describe and give sources for any other data inputs.                                                                                                                                                                                                                                                                                                                                      | pp 11-13                                                                                                                                                                                                        |
| <i>For all data inputs:</i>                                                                           |                                                                                                                                                                                                                                                                                                                                                                                           |                                                                                                                                                                                                                 |
| 8                                                                                                     | Provide all data inputs in a file format from which data can be efficiently extracted (e.g., a spreadsheet rather than a PDF), including all relevant meta-data listed in item 5. For any data inputs that cannot be shared because of ethical or legal reasons, such as third-party ownership, provide a contact name or the name of the institution that retains the right to the data. | Global Health Data Exchange (GHDx,<br><a href="http://ghdx.healthdata.org/">http://ghdx.healthdata.org/</a> )<br>Epi Visualization   Viz Hub<br>( <a href="http://ihmeuw.org/5u6w">http://ihmeuw.org/5u6w</a> ) |
| <b>Data analysis</b>                                                                                  |                                                                                                                                                                                                                                                                                                                                                                                           |                                                                                                                                                                                                                 |
| 9                                                                                                     | Provide a conceptual overview of the data analysis method. A diagram may be helpful.                                                                                                                                                                                                                                                                                                      | p 8<br>Reference 41                                                                                                                                                                                             |

|                               |                                                                                                                                                                                                                                                                         |                                                                                                                                                                                      |
|-------------------------------|-------------------------------------------------------------------------------------------------------------------------------------------------------------------------------------------------------------------------------------------------------------------------|--------------------------------------------------------------------------------------------------------------------------------------------------------------------------------------|
| <b>10</b>                     | Provide a detailed description of all steps of the analysis, including mathematical formulae. This description should cover, as relevant, data cleaning, data pre-processing, data adjustments and weighting of data sources, and mathematical or statistical model(s). | pp 9-13<br>Reference 41                                                                                                                                                              |
| <b>11</b>                     | Describe how candidate models were evaluated and how the final model(s) were selected.                                                                                                                                                                                  | p 11                                                                                                                                                                                 |
| <b>12</b>                     | Provide the results of an evaluation of model performance, if done, as well as the results of any relevant sensitivity analysis.                                                                                                                                        | Reference 41, 49                                                                                                                                                                     |
| <b>13</b>                     | Describe methods for calculating uncertainty of the estimates. State which sources of uncertainty were, and were not, accounted for in the uncertainty analysis.                                                                                                        | p 13<br>p 20                                                                                                                                                                         |
| <b>14</b>                     | State how analytic or statistical source code used to generate estimates can be accessed.                                                                                                                                                                               | Global Health Data Exchange (GHDx,<br><a href="https://ghdx.healthdata.org/gbd-2019/code">https://ghdx.healthdata.org/gbd-2019/code</a> )                                            |
| <b>Results and Discussion</b> |                                                                                                                                                                                                                                                                         |                                                                                                                                                                                      |
| <b>15</b>                     | Provide published estimates in a file format from which data can be efficiently extracted.                                                                                                                                                                              | Epi Visualization   Viz Hub ( <a href="http://ihmeuw.org/5u6w">http://ihmeuw.org/5u6w</a> )<br>GBD Compare   Viz Hub ( <a href="http://ihmeuw.org/5u6z">http://ihmeuw.org/5u6z</a> ) |
| <b>16</b>                     | Report a quantitative measure of the uncertainty of the estimates (e.g. uncertainty intervals).                                                                                                                                                                         | 95% uncertainty intervals provided for all reported estimates in text and tables                                                                                                     |
| <b>17</b>                     | Interpret results in light of existing evidence. If updating a previous set of estimates, describe the reasons for changes in estimates.                                                                                                                                | pp 3-5<br>pp 16-18                                                                                                                                                                   |
| <b>18</b>                     | Discuss limitations of the estimates. Include a discussion of any modelling assumptions or data limitations that affect interpretation of the estimates.                                                                                                                | pp 20-22                                                                                                                                                                             |

21

22

## 23 AUTHOR CONTRIBUTIONS

24 *Managing the overall research enterprise*

25 Theo Vos and M Ashworth Dirac

26 *Writing the first draft of the manuscript*

27 Atalel Fentahun Awedew, Hannah Han, M Ashworth Dirac

28 *Primary responsibility for applying analytical methods to produce estimates*

29 Hannah Han

30 *Primary responsibility for seeking, cataloguing, extracting, or cleaning data; designing or coding figures and tables*

31 Hannah Han

32 *Providing data or critical feedback on data sources*

33 Muktar Beshir Ahmed, Omar Almidani, Erfan Amini, Jalal Arabloo, Ayele Mamo Argaw, Seyyed Shamsadin Athari, Maciej Banach, Amadou  
34 Barrow, Akshaya Srikanth Bhagavathula, Boris Bikbov, Belay Boda Abule Bodicha, Nadeem Shafique Butt, Xiaochen Dai, Linh Phuong Doan, Sahar  
35 Eftekhazadeh, Ali Fatehizadeh, Tushar Garg, Teferi Gebru Gebremeskel, Mahaveer Golechha, Vivek Kumar Gupta, Mehdi Hosseinzadeh, Nahlah  
36 Elkudssiah Ismail, Mihajlo Jakovljevic, Shubha Jayaram, Seyed Behzad Jazayeri, Yousef Saleh Khader, Sang-woong Lee, Shaun Wen Huey Lee,  
37 Narges Malih, Entezar Mehrabi Nasab, Gedefaye Nibret Mihrtie, Awoke Temesgen Misganaw, Ali H Mokdad, Mariam Molokhia, Sreenivas  
38 Narasimha Swamy, Son Hoang Nguyen, Mayowa O Owolabi, Shrikant Pawar, Salman Rawaf, Reza Rawassizadeh, Jasvinder A Singh, Ker-Kan Tan,  
39 Gebremaryam Temesgen, Marcos Roberto Tovani-Palone, Sahel Valadan Tahbaz, Bay Vo, Linh Gia Vu, Vahit Yiğit, Ismaeel Yunusa

40 *Developing methods or computational machinery*

41 Muktar Beshir Ahmed, Akshaya Srikanth Bhagavathula, Xiaochen Dai, Ali Fatehizadeh, Simon I Hay, Mehdi Hosseinzadeh, Sang-woong Lee, Ali H  
42 Mokdad, Reza Rawassizadeh, Bay Vo

43 *Providing critical feedback on methods or results*

44 Behzad Abbasi, Muktar Beshir Ahmed, Omar Almidani, Erfan Amini, Jalal Arabloo, Seyyed Shamsadin Athari, Daniel Atlaw, Maciej Banach,  
45 Amadou Barrow, Akshaya Srikanth Bhagavathula, Vijayalakshmi S Bhojaraja, Boris Bikbov, Belay Boda Abule Bodicha, Nadeem Shafique Butt,  
46 Florentino Luciano Caetano dos Santos, Omid Dadras, Xiaochen Dai, Linh Phuong Doan, Sahar Eftekhazadeh, Ali Fatehizadeh, Tushar Garg,  
47 Teferi Gebru Gebremeskel, Motuma Erena Getachew, Syed Amir Gilani, Mahaveer Golechha, Vivek Kumar Gupta, Mohammad-Salar Hosseini,  
48 Mehdi Hosseinzadeh, Ayesha Humayun, Irena M Ilic, Milena D Ilic, Nahlah Elkudssiah Ismail, Mihajlo Jakovljevic, Shubha Jayaram, Seyed Behzad

49 Jazayeri, Alelign Tasew Jema, Ibraheem M Karaye, Yousef Saleh Khader, Ejaz Ahmad Khan, Sang-woong Lee, Stephen S Lim, Stany W Lobo, Azeem  
50 Majeed, Mohammad-Reza Malekpour, Narges Malih, Ahmad Azam Malik, Entezar Mehrabi Nasab, Tomislav Mestrovic, Irmina Maria Michalek,  
51 Gedefaye Nibret Mihrtie, Mohammad Mirza-Aghazadeh-Attari, Awoke Temesgen Misganaw, Ali H Mokdad, Mariam Molokhia, Sreenivas  
52 Narasimha Swamy, Son Hoang Nguyen, Ali Nowroozi, Mayowa O Owolabi, Shrikant Pawar, David Laith Rawaf, Salman Rawaf, Reza Rawassizadeh,  
53 Chethan Sampath, Jeevan K Shetty, Migbar Mekonnen Sibhat, Jasvinder A Singh, Ker-Kan Tan, Gebremaryam Temesgen, Musliu Adetola Tolani,  
54 Marcos Roberto Tovani-Palone, Sahel Valadan Tahbaz, Rohollah Valizadeh, Bay Vo, Linh Gia Vu, Lin Yang, Fereshteh Yazdanpanah, Arzu Yigit,  
55 Vahit Yiğit, Ismaeel Yunusa, Mazyar Zahir

56 *Drafting the work or revising it critically for important intellectual content*

57 Behzad Abbasi, Mohsen Abbasi-Kangevari, Muktar Beshir Ahmed, Omar Almidani, Erfan Amini, Jalal Arabloo, Daniel Atlaw, Maciej Banach,  
58 Amadou Barrow, Akshaya Srikanth Bhagavathula, Vijayalakshmi S Bhojaraja, Boris Bikbov, Belay Boda Abule Bodicha, Florentino Luciano Caetano  
59 dos Santos, Linh Phuong Doan, Sahar Eftekhazadeh, Ali Fatehizadeh, Tushar Garg, Motuma Erena Getachew, Seyyed-Hadi Ghamari, Veer Bala  
60 Gupta, Vivek Kumar Gupta, Simon I Hay, Mohammad-Salar Hosseini, Irena M Ilic, Milena D Ilic, Nahlah Elkudssiah Ismail, Mihajlo Jakovljevic,  
61 Shubha Jayaram, Alelign Tasew Jema, Ali Kabir, Yousef Saleh Khader, Ejaz Ahmad Khan, Iván Landires, Shaun Wen Huey Lee, Azeem Majeed,  
62 Mohammad-Reza Malekpour, Narges Malih, Ahmad Azam Malik, Tomislav Mestrovic, Irmina Maria Michalek, Mohammad Mirza-Aghazadeh-  
63 Attari, Ali H Mokdad, Mariam Molokhia, Sreenivas Narasimha Swamy, Son Hoang Nguyen, Ali Nowroozi, Virginia Nuñez-Samudio, Mayowa O  
64 Owolabi, Shrikant Pawar, Norberto Perico, David Laith Rawaf, Salman Rawaf, Giuseppe Remuzzi, Amirhossein Sahebkar, Jeevan K Shetty,  
65 Jasvinder A Singh, Ker-Kan Tan, Musliu Adetola Tolani, Marcos Roberto Tovani-Palone, Sahel Valadan Tahbaz, Linh Gia Vu, Lin Yang, Arzu Yigit,  
66 Vahit Yiğit, Mazyar Zahir

67
